# Supplementary material for: Toward an Observation-Based Estimate of Dust Net Radiative Effects in Tropical North Atlantic Through Integrating Satellite Observations and In SituMeasurements of Dust Properties
Source: Copernicus journal article supplement (doi:10.5194/acp-2018-267), 2018-03-27
Supplement: Supplementary file [file acp-2018-267-AC5-supplement.pdf]

# Net Radiative Effects of Dust in Tropical North Atlantic Based on Integrated Satellite Observations and In Situ Measurements

Qianqian Song<sup>1,2</sup>, Zhibo Zhang<sup>1,2\*</sup>, Hongbin Yu<sup>3</sup>, Seiji Kato<sup>4</sup>, Ping Yang<sup>5</sup>, Peter Colarco<sup>3</sup>,  
Lorraine A. Remer<sup>2</sup>, Claire L. Ryder<sup>6</sup>

1. Physics Department, University of Maryland Baltimore County
2. Joint Center for Earth Systems Technology, University of Maryland Baltimore County
3. NASA Goddard Space Flight Center
4. NASA Langley Research Center.
5. Dept. of Atmospheric Sciences, Texas A&M University
6. Department of Meteorology, University of Reading, RG6 6BB, UK.

Send Correspondence to:

Dr. Zhibo Zhang

Email: [zhibo.zhang@umbc.edu](mailto:zhibo.zhang@umbc.edu)

For publication in *Atmospheric Chemistry and Physics*

## Abstract

In this study, we integrate the recent in situ measurements with satellite retrievals of dust physical and radiative properties to quantify the dust direct radiative effects on the shortwave (SW) and longwave (LW) radiation (denoted as  $DRE_{SW}$  and  $DRE_{LW}$ , respectively) in the tropical North Atlantic during summer months from 2007 to 2010. Through linear regression of CERES measured top-of-atmosphere (TOA) flux versus satellite aerosol optical depth (AOD) retrievals, we estimate the instantaneous  $DRE_{SW}$  efficiency at the TOA to be  $-49.7 \pm 7.1$  W/m<sup>2</sup>/AOD and  $-36.5 \pm 4.8$  W/m<sup>2</sup>/AOD based on AOD from MODIS and CALIOP, respectively. We then perform various sensitivity studies based on recent measurements of dust particle size distribution (PSD), refractive index, and particle shape distribution to determine how the dust microphysical and optical properties affect DRE estimates and its agreement with abovementioned satellite-derived DREs. Our analysis shows that a good agreement with the observation-based estimates of instantaneous  $DRE_{SW}$  and  $DRE_{LW}$  can be achieved through a combination of recently observed PSD with substantial presence of coarse particles, a less absorptive SW refractive index, and spheroid shapes. Based on this optimal combination of dust physical properties we further estimate the diurnal mean dust  $DRE_{SW}$  in the region of  $-10$  W/m<sup>2</sup> at TOA and  $-26$  W/m<sup>2</sup> at surface, respectively, of which  $\sim 30\%$  is canceled out by the positive  $DRE_{LW}$ . This yields a net DRE of about  $-6.9$  W/m<sup>2</sup> and  $-18.3$  W/m<sup>2</sup> at TOA and surface, respectively. Our study suggests that the LW flux contains useful information of dust particle size, which could be used together with SW observation to achieve more holistic understanding of the dust radiative effect.

## 1. Introduction

Mineral dust is the most abundant atmospheric aerosol component in terms of dry mass [Choobari *et al.*, 2014, Textor *et al.*, 2006]. The Sahara is the largest source of atmospheric dust aerosols, with an estimated emission of 670 Mt yr<sup>-1</sup> [Rajot *et al.*, 2008, Washington *et al.*, 2003]. African dust from Sahara is regularly lifted by strong near-surface winds and transported westwards within the Saharan Air Layer (SAL) over to the tropical North Atlantic during northern summer [Cuesta *et al.*, 2009, Karyampudi *et al.*, 1999]. During the transport, dust aerosols can scatter and absorb both shortwave solar (referred to as “SW”) and longwave thermal infrared (referred to as “LW”) radiation, and thereby influence Earth’s energy budget [McCormick *et al.*, 1967, Tegen *et al.*, 1996, Yu *et al.*, 2006] . This is known as the direct radiative effect (DRE) of dust, which can have a significant influence on the global energy balance [Boucher *et al.* 2013], as well as regional weather and climate [e.g., Miller and Tegen 1998, Evan *et al.* 2006, Lau and Kim 2007]. Therefore, it is important to quantify dust DREs as accurate as possible. Moreover, mineral dusts can also influence the life cycle and properties of clouds, by altering thermal structure of the atmosphere (known as semi-direct effects) [Ackerman *et al.*, 2000, Hansen *et al.*, 1997, Koren *et al.*, 2004], and by acting as cloud condensation nuclei and ice nuclei (known as indirect effects) [Albrecht, 1989, Rosenfeld *et al.*, 1998, Twomey, 1977] . In addition, when African dust aerosols are deposited into Atlantic Ocean and Amazon Basin, they supply essential nutrients for the marine and rainforest ecosystems [Yu *et al.*, 2015], which has important implications for the biogeochemical cycles [Jickells *et al.*, 2005]. In this study, we focus on the quantification of dust direct radiative effect on both SW and LW radiation.

Substantial effort has been made to understand and quantify the DRE of mineral dust since the 1980s [Carlson *et al.*, 1980, Cess, 1985, Liao *et al.*, 1998, Ramaswamy *et al.*, 1985]. Most

studies have focused on the SW DRE ( $DRE_{sw}$ ) of mineral dust under clear-sky (cloud free) conditions [Myhre *et al.*, 2003, Tegen *et al.*, 1996, Yu *et al.*, 2006] . Through scattering and absorption, dust aerosols reduce the amount of solar radiation reaching the surface, inducing a negative (cooling) effect at the surface. The  $DRE_{sw}$  of dust at the top of the atmosphere (TOA) depends also strongly on the albedo of the underlying surface [Keil *et al.*, 2003, Yu *et al.*, 2006]. Over a dark surface, the scattering effect of dust dominates, it leads to a negative DRE at TOA that cools the climate system [Myhre *et al.*, 2003, Tegen *et al.*, 1996] . In contrast, high reflectance of a bright surface enhances the absorption by dust aerosols and could yield a positive dust  $DRE_{sw}$  (warming effect on the climate system) at TOA when the surface albedo exceeds a critical value [Zhang *et al.* 2016, Xu *et al.*, 2017]. Different from other aerosol types (e.g., smoke and sulfate aerosols), dust aerosols are large enough to have significant LW direct radiative effect ( $DRE_{LW}$ ) [Sokolik *et al.*, 1999, Sokolik *et al.*, 1998]. Lofted dust aerosols absorb the LW radiation from the warm surface and re-emit the LW radiation usually at lower temperature, thereby reducing the outgoing LW radiation and leading to a positive DRE at TOA that tends to warm the climate system. At the same time, they emit the LW radiation downward that generates a warming effect at the surface. The dust LW effect depends strongly on surface emissivity [Yang *et al.*, 2009] and the vertical profile of atmosphere temperature. The net radiative effect ( $DRE_{net}$ ) of dust is the summation of its  $DRE_{sw}$  and  $DRE_{LW}$ . Note that  $DRE_{sw}$  only acts during daytime, whereas  $DRE_{LW}$  operates during both day and night.

Quantification of the  $DRE_{sw}$  and  $DRE_{LW}$  of dust remains challenging and there is a large range of estimates in the literature. Take the Tropical Atlantic for example. Yu *et al.* [2006] found that the seasonal (JJA) average clear-sky aerosol  $DRE_{sw}$  at TOA in this region varies from  $-5.7 \text{ W/m}^2$  to  $-12.8 \text{ W/m}^2$  based on observations and from  $-3.7 \text{ W/m}^2$  to  $-10.4 \text{ W/m}^2$  based on model

95 simulations. An important reason is that dust DRE depends on many factors, including both the  
96 microphysical (e.g., dust particle size and shape) and optical (e.g., refractive index) properties, as  
97 well as the surface and atmospheric properties (e.g., surface reflectance and temperature,  
98 atmospheric absorption). Sokolik et al. [1998] showed that for the sub-micron dust particles, the  
99  $DRE_{SW}$  is dominant and  $DRE_{LW}$  is negligible, whereas for super-micron dust particles,  $DRE_{LW}$  is  
100 more important [Sokolik et al., 1996, Sokolik et al., 1999]. Therefore, an accurate measurement of  
101 the particle size distribution (PSD) is highly important for estimating the DRE of dust. However,  
102 dust PSDs are highly variable and difficult to measure or retrieve, and, as a result, the observations  
103 of dust PSD are usually subjected to large uncertainties [see Mahowald et al., 2014 and references  
104 therein]. PSD inferred from AERONET observations [Dubovik et al., 2006] relies on observations  
105 at shortwave channels, which could bias the dust size low. In fact, more and more observations are  
106 emerging to suggest that dust PSD even in regions far from source regions contains substantial  
107 fraction of coarse particles. Based on the airborne in-situ measurement of dust PSD in Caribbean  
108 Basin from the Puerto Rico Dust Experiment (PRIDE) campaign, Maring et al. [2003] noted that  
109 dust particles appear to settle more slowly than expected from the widely used Stokes gravitational  
110 settling model. Similarly, recent measurements from the latest Fennec project [Ryder et al., 2013b]  
111 and the Saharan Aerosol Long-range Transport and Aerosol-Cloud-interaction Experiment  
112 (SALTRACE) [Weinzierl et al., 2017] all suggest that transported dust aerosols in the SAL are  
113 significantly coarser than expected based on the Stokes gravitational deposition. Such unexpected  
114 existence of coarse particles has important implications for understanding the DRE of dust. In a  
115 case of significant fraction of coarse particles, the warming effect on LW radiation (positive)  
116  $DRE_{LW}$  would partly cancel the  $DRE_{SW}$  leading to a less negative or even positive  $DRE_{net}$ . Most  
117 recently, Kok et al. [2017] argue that most of the current global climate models tend to

underestimate the size of dust particles and therefore overestimate the cooling effects of dust. Their estimate of the global mean dust  $DRE_{net}$  is between  $-0.48$  and  $+0.20 \text{ W m}^{-2}$ , which includes the possibility that dust causes a net warming of the planet.

In addition to dust particle size, particle shape and refractive index also have significant influence on dust DRE. Dust particles are generally nonspherical in shape, which make their single-scattering properties (i.e., extinction efficiency, single-scattering albedo and scattering phase matrix) fundamentally different from those based on spherical models. A few dust particle shape models have been developed [Dubovik *et al.*, 2006, Kandler *et al.*, 2009], which have been increasingly used in aerosol remote sensing and modeling [Levy *et al.*, 2007]. Räisänen *et al.* [2013] found that replacing the spherical dust models in a GCM with nonspherical model leads to negligible changes in the DRE of dust at TOA. However, a recent GCM-based study by Colarco *et al.* [2014] suggests that the influence of nonsphericity on dust DRE can be significant at surface and within the atmosphere, depending on the refractive index of dust. Similarly, Kok *et al.* [2017] argue that a spherical model significantly underestimates the extinction of dust, leading to errors in estimate of dust DRE.

Over the past few decades, substantial efforts have been made to measure the spectral refractive index of dust, mostly limited to the SW spectral range [Balkanski *et al.*, 2007, Dubovik *et al.*, 2002, Dubovik *et al.*, 2006, Formenti *et al.*, 2011, Hess *et al.*, 1998, Levoni *et al.*, 1997]. The current widely-used LW refractive index of dust was measured using rather old techniques in the 1970s and 1980s [e.g., Volz 1972, 1973, Fouquart *et al.* 1987]. Recently, Di Biagio *et al.* [2014, 2017] compiled a comprehensive dust aerosol refractive index database in the LW spectrum ranging from 3 to 15  $\mu\text{m}$ , based on 19 natural samples from 8 dust regions over the globe. This database is the first one as far as we know to document the regional differences in dust LW

refractive index due to the regional characteristics of dust chemical composition. We also call special attention to a newly developed database of Saharan and Asian dust [Stegmann and Yang, 2017].

Satellite observations have long become indispensable for studying the dust aerosols. In particular, the combination of passive (e.g., MODIS and CERES) and active (e.g., CALIPSO) sensors on board of NASA's A-Train satellite constellation provides unprecedented data to study dust aerosols, from long range transport [e.g., Liu et al. 2008, Yu et al. 2015] to dust DRE [e.g., Yu et al. 2006, Zhang et al. 2016]. As A-Train observations become mature, substantial efforts have been made to collocate and fuse the observations from different sensors to make the use of A-Train observations easier for the users. A prominent example is the CERES- CALIPSO- CloudSat -MODIS (CCCM) product developed by Kato et al. [2011], which has become a popular dataset for studying the radiative effects of clouds and aerosols and for evaluating GCMs.

The present study is inspired and motivated by the latest measurements of the microphysical and optical properties of dust, namely the in-situ dust PSD from the Fennec field campaign [Ryder et al. 2013a, 2013b] and the dust LW refractive index from Di Biagio [2014, 2017], as well as the recent studies (e.g., Kok et al.[2017]) suggesting that cooling effects of dust is overestimated in most climate models due to the underestimation of dust size. The study is carried out in three steps, each with a distinct objective. First, we attempt to derive a set of observation-based *instantaneous* dust  $DRE_{SW}$  and  $DRE_{LW}$  for the tropical North Atlantic based on the A-Train satellite observations reported in the CCCM product, without imposing any assumptions on dust size, shape or refractive index. Here, the instantaneous dust DRE represents dust DRE derived under the conditions (e.g., solar position, atmospheric condition) at the measured or computed time to distinguish from the diurnally averaged DRE in Section 4. Then, we perform

multiple sets of radiative transfer computations of the *instantaneous* dust DRE in the North Atlantic region based on the same dust extinction profiles from CCCM in combination with different dust physical and optical properties. The objective is to understand the sensitivity of dust DRE<sub>SW</sub> and DRE<sub>LW</sub> to the PSD, nonsphericity, and refractive index of dust and to obtain a set of dust properties that yield the best agreement with satellite flux observations (e.g., CERES). In the third step, we use the derived dust properties and extend the radiative transfer computations to *diurnal mean* and to DRE at surface. The rest of this paper is organized as follows: Section 2 describes the data and model used. Section 3 presents the sensitivity of dust DRE to dust size, shape and refractive index. Section 4 discusses diurnally averaged net DRE of dust aerosols and uncertainty analysis. Section 5 concludes the article.

## **2. Data and Models**

### **2.1 The CERES- CALIPSO-CloudSat -MODIS (CCCM) product**

To estimate instantaneous dust DRE, we use aerosol and radiation remote sensing products from the A-Train satellite sensors, namely, the integrated CERES, CALIPSO, CloudSat, MODIS merged product (CCCM) developed by [Kato *et al.*, 2011]. In the CCCM product, high-resolution CALIOP, CloudSat and MODIS retrievals are collocated with 20-km CERES footprints. For each CERES footprint, the CCCM product provides the TOA flux observations (both SW and LW) from CERES, aerosol (MOD04 “Dark Target” product [Remer *et al.*, 2005]) and cloud (MOD06 [Platnick *et al.*, 2003]) properties retrieved from MODIS, aerosol optical thickness for each aerosol layer from CALIOP [Winker *et al.*, 2010] and cloud vertical profile from the combination of CALIOP and CloudSat [Kato *et al.*, 2010]. Up to 16 aerosol layers identified by CALIOP are kept within a CERES footprint. *Figure 1* shows the JJA mean aerosol optical depth (AOD) from the



CALIOP observations reported in the CCCM product. Clearly, the transported dust aerosols lead to enhanced AOD in the tropical North Atlantic region.

In addition to the “raw” retrievals, the CCCM product also provides post-processed flux computations for each CERES pixel based on derived aerosol and/or cloud extinction profiles, which is done in the following steps. First, the CALIOP aerosol retrievals within each CERES pixel are averaged to obtain the aerosol extinction profile at the 0.5  $\mu\text{m}$  reference wavelength. Then, the aerosol type and associated spectral optical properties, e.g., extinction coefficient, single-scattering albedo, and asymmetry factor are specified mostly based on the aerosol type simulations from the Model of Atmospheric Transport and Chemistry (MATCH [Collins *et al.*, 2001], with the exception of dust aerosols. If CALIOP observes dust aerosols (dust and polluted dust), the aerosol type is set to dust. This is based on the consideration that the depolarization observation capability of CALIOP is ideal for dust detection because the nonsphericity of dust can cause significant depolarization in contrast to most other types of aerosols. Finally, the aerosol extinction profiles and the aerosol spectral optical properties are used to compute the broadband fluxes at both TOA and surface and for both SW and LW under 2 conditions: 1) with aerosol, 2) without aerosol, so that the aerosol DRE can be derived from the difference of the two conditions. Temperature and humidity profiles used in flux computations are from the Goddard Earth Observing System (GEOS-5) Data Assimilation System reanalysis [Rienecker *et al.*, 2008].

## **2.2 Dust Physical and Optical models**

To investigate the sensitivity of dust DRE to microphysical and optical properties of particles, we use several sets of widely used or newly obtained dust size distribution, dust shape distribution and dust refractive index.

Two dust particle size distributions (PSD) shown in *Figure 2*, are considered in this study. One PSD is inferred based on AERONET ground-based retrievals at Cape Verde site (16°N, 22°W) from [Dubovik *et al.*, 2002] (referred to as “AERONET” PSD). The other dust PSD is obtained from the recent airborne measurements of transported Saharan dust from the Fennec 2011 field campaign over both the Sahara (Mauritania and Mali) and the eastern Atlantic Ocean, between the African coast and Fuerteventura. Ryder *et al.* [2013a] separate the PSD measurements from this campaign into three broad categories: fresh, aged, SAL (acronym for “Saharan Air Layer”). The fresh category over the Sahara represents dust uplifted no more than 12 hours prior to measurement; the aged category over the Sahara represents dust aerosols mobilized 12 to 70 hours prior to measurement; the SAL category represents dust aerosols transported over the adjacent east Atlantic, mostly from flights over Fuerteventura, Canary Islands (28°N, 13°W). All these categories come from the mean of vertical profile observations (excluding the marine boundary layer for SAL categories). The Fennec airborne PSD dataset is particularly novel, in that larger particle sizes were measured than has been done previously in dust layers, with the exception of Weinzierl *et al.*, 2011, and that errors due to sizing uncertainties have been specifically quantified (see Ryder *et al.*, 2013b and Ryder *et al.*, 2015 for full details). Because this paper focuses on the Tropical Atlantic Ocean region, we use dust size distribution in the SAL category (referred to as the “Fennec-SAL PSD”). Evidently from *Figure 2*, the Fennec-SAL PSD, which peaks around 5~6  $\mu\text{m}$  and has a significant fraction of particles with  $r > 10\mu\text{m}$ , is much coarser than the AERONET PSD, which peaks around 1~2  $\mu\text{m}$  and has almost no particles  $r > 10\mu\text{m}$ .

The dust refractive indices are taken from three sources:

(1) The Optical Properties for Aerosols and Clouds database (OPAC) [Hess *et al.*, 1998], which has been widely used in climate models and satellite remote sensing algorithms.

(2) A merger of remote sensing based estimates of dust refractive indices in the shortwave from 0.5  $\mu\text{m}$  to 2.5  $\mu\text{m}$  [Colarco *et al.*, 2014], drawn from Kim *et al.* [2011] in the visible, and Colarco *et al.* [2002] in the UV and (referred to as “Colarco-SW”). Kim [2011] collected the AERONET (V 2) retrievals from 14 sites over North Africa and the Arabian Peninsula. Then the dust refractive index is derived from the dust dominant cases for these sites selected based on the combination of large aerosol optical depth ( $\text{AOD} \geq 0.4$  at 440 nm) and small Ångström exponent ( $\text{Å}_{\text{ext}} \leq 0.2$ ) to select the dust cases. Colarco *et al.* [2002] derived the dust refractive index in the UV by matching the simulated dust radiative signature in the UV with the satellite observations from the Total Ozone Mapping Spectrometer.

(3) The refractive indices in the LW from 3 $\mu\text{m}$  ~15 $\mu\text{m}$  from Di Biagio *et al.* [2017] (referred to as “Di-Biagio-LW”). This database is based on the laboratory measurements of 19 natural soil sample from 8 regions: northern Africa, the Sahel, eastern Africa and the Middle East, eastern Asia, North and South America, southern Africa, and Australia. The refractive index from the Mauritania site is selected for this study because it is geographically close to the Fennec field campaign.

*Figure 3* compares the real and imaginary parts of the refractive index for each of these data sets. In the SW, the imaginary part of the OPAC refractive index is much greater than that of Colarco-SW, which implies that dust aerosols based on the OPAC refractive index is more absorptive. In the LW, the Di-Biagio-LW refractive index is smaller than the OPAC values in terms of both the real and imaginary parts.

Dust aerosols are generally nonspherical in shape. Spheroids have proven to be a reasonable first-order approximation of the shape of nonspherical dust [Dubovik *et al.*, 2006, Mishchenko *et al.*, 1997]. The shape of a spheroid particle is determined by the so-called aspect

ratio, i.e., ratio of the polar to equatorial lengths of the spheroid. In our study, two spheroidal shape distributions are used for computing the optical properties of non-spherical dust: (1) a size-independent aspect ratio distribution from Dubovik et al. [2006] (see Figure 4a) and (2) a size-dependent aspect ratio distribution extracted from Table 2 in Koepke et al. [2015], which is discretized from measurement data of Kandler et al. [2009] (Figure 4b). The Dubovik et al. [2006] shape distribution employs both oblate (aspect ratio  $< 1$ ) and prolate (aspect ratio  $> 1$ ) spheroids, while the Kandler et al. [2009] shape distribution considers only prolate spheroids. For comparison purpose, we also include spherical dust in our sensitivity studies. We use the Lorenz-Mie theory code of Wiscombe [1980] to compute the optical properties of spherical dust particles. The optical properties of spheroidal dust particles are derived from the database of Meng et al. [2010]. Note that we assume volume equivalent radius for the AERONET-PSD to be consistent with Dubovik et al. [2006] and the maximum dimension for Fennec-SAL PSD to be consistent with Ryder et al. [2013b].

## 2.3 Radiative transfer modeling

The Rapid Radiative Transfer Model (RRTM) [Mlawer et al., 1997] is used to compute both SW and LW radiative fluxes for both clear and dusty atmospheres. RRTM retains reasonable accuracy in comparison with line-by-line results for single column calculations. It divides the solar spectrum into 14 continuous bands ranging from 0.2  $\mu\text{m}$  to 12.2  $\mu\text{m}$  and the thermal infrared (3.08  $\mu\text{m}$  - 1000  $\mu\text{m}$ ) into 16 bands. We explicitly specify the spectral AOD,  $\omega$  and  $g$  of dust aerosols for every band in the radiative transfer simulations.

## 3. Case Selection and Observation-based Estimate of Instantaneous Dust DRE

### 3.1 Selection of cloud-free and dust-dominant cases in the CCCM product

In this study, we focus on the Saharan dust outflow region in North Atlantic marked by the box in Figure 1 ( $10^{\circ}\text{ N} \sim 30^{\circ}\text{ N}$ ,  $45^{\circ}\text{ W} \sim 20^{\circ}\text{ W}$ ). This selection is based on several considerations. Firstly, during the summer months (JJA) this region is dominated by transported dust aerosols from Sahara. Secondly, because the ocean surface is dark, dust aerosols have a strong negative DRE<sub>sw</sub> in this region. Thirdly, the abovementioned AERONET Cape Verde and Fennec-SAL PSD measurements are made in the vicinity of this region. Finally, the dust DREs in this region have been extensively studied in the literature, making it easier for us to compare our results with previous work.

We first select cloud-free and dust-dominant CERES pixels in the region from four summer seasons (2007~2010) of the available CCCM product. Within each CERES pixel, the CCCM product report two cloud masks, one from CALIOP and the other from MODIS. The former is more sensitive to optically thin clouds but has a very narrow spatial sampling rate available only along the CALIOP ground track. The latter provides the cloud mask for the entire CERES pixel but may miss thin clouds. Because of the relative large footprint size ( $\sim 20\text{ km}$ ), the cloud-free condition actually poses a very strong constraint on the CERES product. Out of the total 36165 of CERES pixels in this region from 4 seasons of data, we found 1663 (only 5%) of cloud-free pixels according to the CALIOP cloud mask. The sampling is further reduced to 464 (only 1.3%) if the MODIS cloud mask is used to ensure the entire CERES footprint is cloud-free. This result is not surprising because the MODIS cloud mask is more “clear-sky conservative”, i.e., it tends to label a pixel as cloudy if there is any ambiguity in its cloud mask test [Ackerman *et al.*, 1998]. A comparison of collocated CALIOP and MODIS cloud mask along the CALIOP track by [Holz *et al.*, 2008] reveals that MODIS masks more pixels as clear-sky than CALIOP does in the tropical Atlantic dust outflow region (see their Fig. 3a), which is consistent with our result.

After selecting the cloud-free cases, we use the aerosol type information in the CCCM product to further select dust-dominant cases (i.e., more than 90% of the aerosols within a given CERES pixel are attributed to dust, in terms of area coverage). As aforementioned, the CCCM product relies on CALIOP observations for detecting dust aerosols. After imposing the dust-dominant condition, we are left with a total of 607 and 245 cloud-free and dust-dominant CERES pixels, if CALIPSO and MODIS cloud mask are used, respectively. Furthermore, we found that within these selected pixels 153 out of 607 cases and 87 out of 245 cases have both CALIOP and MODIS aerosol optical depth (AOD) retrievals in the CCCM product, and the rest (454 out of 607 cases and 158 out of 245 cases) have AOD retrievals only from the CALIOP, but no AOD retrieval from MODIS. The reason for this is unclear and beyond the scope of this study, but perhaps due to the more rigorous quality control used in the passive aerosol retrieval from MODIS [Remer *et al.*, 2005].

### **3.2 Observation-based estimate of instantaneous dust DRE**

Many previous studies have shown that the aerosol  $DRE_{sw}$  over the dark ocean surface is approximately linear with the AOD. The increasing rate of the magnitude of  $DRE_{sw}$  with AOD is called the  $DRE_{sw}$  efficiency which is an important and useful quantity in many applications such as aerosol model evaluation [Zhou *et al.*, 2005]. We note that  $DRE_{sw}$  depends on solar zenith angle (SZA). However, Because the selected region is relatively small, the SZA at the A-Train overpass time in the domain only varies slightly among our selected cases, from  $20^\circ$  to  $28^\circ$ . Considering the limited sample size and the small SZA variation, we therefore estimate DRE efficiency based on the combination of all selected cases without breaking them into smaller SZA intervals. Because of the nearly linear relationship between  $DRE_{sw}$  and AOD, the CERES TOA flux

observation and the collocated AOD retrievals from either CALIOP or MODIS can be combined  
 to derive an observation-based estimate of the *instantaneous* dust DRE. *Figure 5* shows linear  
 regressions of CERES measured upward SW flux at TOA with satellite retrieved AOD for the  
 selected cloud-free and dust dominant cases. Black dots and lines are for selected cases using the  
 CALIOP cloud mask. For the 153 cases with both CALIOP and MODIS AOD retrievals, the  
 combination of CERES and MODIS (*Figure 5a*) leads to a DRE<sub>sw</sub> efficiency of dust  $-49.7 \pm 7.1$   
 $\text{W/m}^2/\text{AOD}$  (AOD is at  $0.5 \mu\text{m}$ ) with a linear regression  $R^2$  value of 0.69. The uncertainty, i.e.,  
 $\pm 7.1 \text{ W/m}^2/\text{AOD}$ , associated with the regression line coefficients is estimated based on the 1-  $\sigma$   
 (one standard deviation) errors following Hsu et al. [2000]. The combination of CERES flux and  
 CALIOP AOD (*Figure 5b*) leads to a DRE<sub>sw</sub> efficiency of  $-36.5 \pm 4.8 \text{ W/m}^2/\text{AOD}$  based on 1-  $\sigma$   
 error with a  $R^2$  value of 0.5. To investigate the impact of different cloud mask, we also show the  
 regression results derived from the cases selected based on MODIS cloud mask in *Figure 5* (red  
 dots and lines). We notice that the results are very similar to those based on the CALIOP cloud  
 mask. Therefore, we conclude that the selection of cloud mask has negligible impact on our  
 estimation of DRE and the main uncertainty is associated with the AOD retrieval. Considering that  
 the MODIS and CALIOP aerosol retrievals are based on completely different methods, some  
 difference between the two are not surprising. The tighter correlation between MODIS AOD and  
 TOA upward SW flux is expected because MODIS retrieval is based on the reflected spectral solar  
 radiation, whereas the CALIOP AOD retrievals are based on the inversion of backward scattering  
 lidar signals. The potential reasons for the differences between CALIOP and MODIS AOD  
 retrievals are beyond the scope of this study. Interested readers are referred to a couple of recent  
 comparison studies by Kim et al. [2013] and Ma et al. [2013].

In summary, the *instantaneous* dust DRE<sub>sw</sub> efficiency in the selected region during summer season is  $-49.7 \pm 7.1$  W/m<sup>2</sup>/AOD based on CERES-MODIS observations and  $-36.5 \pm 4.8$  W/m<sup>2</sup>/AOD based on CERES-CALIOP observations. With the DRE<sub>sw</sub> efficiency the DRE<sub>sw</sub> can be easily derived from the AOD observations. The *instantaneous* DRE<sub>sw</sub> estimated from the CERES-MODIS and CERES-CALIOP data is  $-14.2 \pm 2.0$  W/m<sup>2</sup> and  $-10.4 \pm 1.4$  W/m<sup>2</sup>, respectively (see Table 1).

In addition to the SW flux measurement, the CCCM product also provides the CERES measurement of LW flux at TOA. Figure 6 shows the histograms of the broadband outgoing longwave radiation (OLR) measured by CERES for the selected cases. Note that besides dust AOD, OLR also strongly depends on other factors such as surface temperature, atmospheric profiles and dust altitude. As a result, there is a high variability in those abovementioned factors among the selected 607 cases. Therefore, it is not possible to derive the DRE<sub>LW</sub> efficiency and DRE<sub>LW</sub> in the same way as we did for the SW. Here we use a different method. To estimate the DRE<sub>LW</sub>, we first computed the dust-free OLR based on ancillary data of surface temperature and atmospheric profiles reported in the CCCM which is from the GEOS Model of NASA's Global Modeling and Assimilation Office (GMAO) [Kato et al. 2011]. Then, the DRE<sub>LW</sub> can be estimated from the difference between CERES observed OLR (i.e., blue solid line in Figure 6) and the computed dust-free OLR (i.e., black dashed line in Figure 6). We refer to this method as “*semi-observation based*” as it is based on the combination of observed dust-laden OLR and computed dust-free OLR. To test if our computed dust-free OLR has any potential bias due to, for example, errors in the ancillary data (i.e., atmospheric gas and temperature), we selected 75 cloud free cases in the same region and season with no dust detected by CALIPSO. Note that because of the small dust loading in these cases the computed OLR at TOA mainly depends on the accuracy of ancillary data of



surface temperature and atmospheric profiles. Therefore, the comparison between the computed OLR and CERES measurements of those cases can inform us if there is any potential bias in our computation of dust-free OLR. It turns out that the difference between RRTM and CERES OLR has a mean value around  $0.7 \text{ W/m}^2$  with standard deviation around  $3.8 \text{ W/m}^2$  (not shown). Therefore, in the following analysis all our dust-free OLRs are reduced by  $0.7 \text{ W/m}^2$  to account for this positive bias, which leads to a semi-observation-based *instantaneous*  $\text{DRE}_{\text{LW}}$  of dust at  $2.7 \pm 0.32 \text{ W/m}^2$  with the 95% confidence level.

## **4. Sensitivity of Dust DRE to Microphysical and Optical Properties of Particles**

The cloud-free and dust-laden cases from the CCCM product facilitate an ideal testbed for investigating the sensitivity of dust DREs to the microphysical (i.e., PSD and shape) and optical (i.e., refractive index) properties of dust. We use the aerosol extinction profiles at the  $0.5 \mu\text{m}$  from the CCCM product (which is based on CALIOP/CALIPSO observations) and different combinations of the dust properties to drive multiple sets of radiative transfer simulations of dust DREs. Through comparisons of the radiative transfer simulations with CERES observation, we study how the physical and optical properties influence both the  $\text{DRE}_{\text{SW}}$  and  $\text{DRE}_{\text{LW}}$  of dust. It should be mentioned here that the CCCM product also use the same methodology to generate the aforementioned post-processed flux profile. In the analysis, we will also compare our dust DRE simulations with the results provided in the CCCM products.

### **4.1 Sensitivity to dust size and refractive index**

In the first sensitivity study, we study the influences of dust size and refractive index on the dust scattering properties and consequently dust DREs. Based on different combinations of the

PSDs (AERONET vs. Fennec-SAL) and SW refractive index (OPAC vs. Colarco-SW), we simulate four sets dust spectral scattering properties (Figure 7), and correspondingly four sets of dust DRE<sub>sw</sub> efficiency (Figure 8). In the simulations, dust particles are assumed to be spheroidal and the aspect ratio distribution from Dubovik et al. [2006] (see Figure 4a) is used. The OPAC-LW refractive index is used. The impacts of dust shape distribution and LW refractive index on dust DRE will be discussed later.

Figure 7 shows the scattering properties for the four different combinations of dust PSD and refractive index. The extinction efficiency ( $Q_e$ ) based on the Fennec-SAL PSD is significantly larger than that based on the AERONET PSD (Figure 7a). The spectral shape is also different. The  $Q_e$  based on the Fennec-SAL PSD is rather flat in the SW region due to its large size whereas the  $Q_e$  based on the AERONET PSD decreases with wavelength. The  $Q_e$  shows no sensitivity to refractive index in Figure 7a. It is because the Colarco-SW and OPAC-SW are different only in the imaginary part (see Figure 3) which has minimal influence on  $Q_e$ . In contrast, the single scattering albedo (SSA) in Figure 7b shows more sensitivity to refractive index. As expected, the Fennec-SAL PSD and OPAC-SW combination (i.e., larger size and more absorptive refractive index) has the smallest SW SSA while the AERONET PSD and Colarco-SW i.e., smaller size and less absorptive refractive index) has the largest SW SSA. The other two combinations yield similar SW SSA that are in between the abovementioned two extremes. The asymmetry factor ( $g$ ) in Figure 7c shows a primary sensitivity to size and a secondary sensitivity to refractive index.

Figure 7d shows spectral variation of dust AOD normalized with respect to AOD at 0.5 $\mu$ m. The peak wavelength of solar radiation (0.5 $\mu$ m) and peak wavelength of terrestrial thermal radiation (10 $\mu$ m) are highlighted with dashed lines. The 0.5  $\mu$ m AOD is used as the reference for normalization because as aforementioned, we use the 0.5  $\mu$ m aerosol extinction profile in the

CCCM derived from CALIOP to drive our radiative transfer simulations. After spectral normalization, one can see that given the same  $0.5\ \mu\text{m}$  AOD the  $10\ \mu\text{m}$  AOD based on the Fennec-PSD is much larger than that based on the AERONET PSD by around 80%. This is an important feature that has important implications for the  $\text{DRE}_{\text{LW}}$  of dust. The SW reflection of dust depends not only on AOD, but also SSA and  $g$ . Figure 7e shows spectral variation of  $\text{AOD} \times \text{SSA} \times (1-g)$ , where AOD indicates dust load, is multiplied by SSA to take the scattered fraction, and then multiplied by  $(1-g)$  to take the backscattered portion. It is a quantity more relevant for understanding dust SW reflection. Evidently, this index suggests that the combination of smaller size (AERONET PSD) and less absorptive refractive index (Colarco-SW) leads to most reflective dust among the four sets of simulations, whereas the larger size (Fennec PSD) and more absorptive refractive index (OPAC) combination generates least reflective dust. The other two combinations are in between and somewhat similar.

Figure 8 shows the four sets of simulated TOA upward SW fluxes as a function of the input AOD at  $0.5\ \mu\text{m}$ . For comparison purpose, the  $\text{DRE}_{\text{SW}}$  efficiency regression results based on observations in Figure 5, as well as the results reported in the CCCM products, are also plotted. Focusing on our computations first, we note that as expected the most reflective dust based on the combination of AERONET PSD and Colarco-SW refractive index leads to the largest  $\text{DRE}_{\text{SW}}$  efficiency ( $-70.5\ \text{W/m}^2/\text{AOD}$ ), while the least reflective dust based on the combination of Fennec-SAL PSD and OPAC ref yields the smallest  $\text{DRE}_{\text{SW}}$  efficiency ( $-30.6\ \text{W/m}^2/\text{AOD}$ ). Clearly, these results are outside of the range based on observations (i.e.,  $-36.5 \pm 4.8 \sim -49.7 \pm 7.1\ \text{W/m}^2/\text{AOD}$ ), suggesting they are too extreme. The other two combinations, i.e. AERONET PSD+OPAC-SW and Fennec-SAL PSD + Colarco-SW, generate similar  $\text{DRE}_{\text{SW}}$  efficiency at  $-47.6$  and  $-53.3\ \text{W/m}^2/\text{AOD}$ , respectively, both comparable to the CERES-MODIS based value. Interestingly, the

DRE<sub>sw</sub> efficiency based on the flux computations reported in the CCCM product is  $-81$  W/m<sup>2</sup>/AOD, even larger than that based on AERONET PSD + Colarco refractive index, suggesting that the dust model used in the CCCM flux computations is too reflective in the SW. The *instantaneous* DRE<sub>sw</sub> and DRE<sub>sw</sub> efficiency at surface for the two combinations that agree with the CERES observation, i.e., AERONET PSD+OPAC-SW and Fennec-SAL PSD + Colarco-SW, are given in the *Table 2*.

One additional point to note in Figure 8 is that, the TOA flux vs. AOD relations based on the radiative transfer computations are much less scattered than those based on observations. The  $R^2$  value for the computation-based regressions all exceed 0.95, much higher than the observation-based results in Figure 5. This is because, in reality the TOA flux is influenced not only by AOD, but also many other factors, such as surface reflectance variation, boundary layer aerosols that might not be undetected by satellite, uncertainty in satellite retrieval algorithm. Most of these factors are not accounted for in the radiative transfer computations, leading to a near perfect correlation between TOA flux and input AOD. This should not be interpreted as a lack of variability, rather than a smaller uncertainty.

On one hand, the results in Figure 8 are encouraging, as they suggest that a relatively simple combination of dust size and refractive index can enable us to simulate the dust DRE<sub>sw</sub> that are comparable with observations. On the other hand, the fact that two different dust models lead to similar DRE<sub>sw</sub> efficiency simulation, both comparable with observation, points to a long-lasting problem in aerosol remote sensing. That is, different combinations of aerosol microphysical and optical properties can lead to similar radiative signatures. The combination of smaller dust size with more absorptive refractive index is as good as the combination of larger size with less absorptive refractive index, as long as DRE<sub>sw</sub> is concerned.

But are the two combinations also equal in terms of closing the LW radiation? This is an important question, because ideally an appropriate dust model should close both SW and LW radiation. To address this question, we extend our radiative transfer simulations to the LW. It is important to point out that the LW and SW dust radiative properties are not independent but related through the physical properties of dust. For example, the AOD at a given wavelength  $\lambda$  in LW is related to the visible AOD through

$$AOD(\lambda) = AOD(0.5\mu m) \frac{Q_e(\lambda)}{Q_e(0.5\mu m)}, \quad (1)$$

where  $Q_e$  is the extinction efficiency that is determined by dust size, shape and refractive index. The dust size and shape are obviously independent of wavelength and therefore connect the SW and LW. Even the refractive index in the SW and LW regions should be physically self-consistent because refractive index is determined by the chemical composition of dust. Unfortunately, because the refractive index measurements are often made either for SW only or LW only, there is a lack of measurement of dust refractive index measurement from visible all the way to thermal infrared.

In our computations, we first use the LW dust refractive index from OPAC to compute the dust LW scattering properties and the corresponding OLR. Based on the same OPAC-LW refractive index, the Fennec-SAL PSD yields an instantaneous  $DRE_{LW}$  of +3.0 W/m<sup>2</sup> at TOA and +7.7 W/m<sup>2</sup> at surface (see *Table 3*). The results based on the AERONET PSD are significantly smaller, +1.8 W/m<sup>2</sup> at TOA and +4.7 W/m<sup>2</sup> at surface. This difference between the two PSDs can be easily understood with Figure 7b. Given the same visible AOD, the coarser Fennec PSD has a larger infrared AOD than the AERONET PSD, and therefore stronger warming effects in the LW.

The more important question is which one, Fennec or AERONET PSD, leads to OLR simulations that agree better with the CERES observation? The differences between the computed

OLRs and the CERES measurements of OLR for the selected dust cases are shown in *Table 4*, together with the significance test results, i.e., ‘t-score’ and ‘p-value’ from the Student’s t-test. Interestingly, the OLRs based on the combination of AERONET PSD + OPAC-LW refractive index are systematically warmer (larger) than CERES measurements by an average of  $0.9 \text{ W/m}^2$ . The high t-score of 2.36 and low p-value of 0.02 indicate this warm bias to be statistically significant. In contrast, the OLRs based on the combination of Fennec PSD + OPAC-LW refractive index have a bias only at  $-0.5 \text{ W/m}^2$  and a p-value (0.55) significantly larger than the commonly used 0.05 threshold, which means that OLR of this dust model is statistically indistinguishable from the CERES measurements. Then, to investigate the sensitivity of the computation to LW dust refractive index, we performed the computations again based on the Di Biagio et al. LW refractive index. As shown in *Table 4*, the OLR based on Fennec PSD is still better than that based on the AERONET PSD, even though both sets deteriorate slightly in comparison with the results based on the OPAC LW refractive index. Overall, the size difference is the primary reason for the fact that the OLR based on Fennec PSD is systematically smaller than that based on the AERONET PSD. As shown in Figure 7, due to size difference, the  $Q_e$  based on the Fennec-SAL PSD (coarser) decreases at a slower rate than that based on the AERONET PSD (finer). As a result, according to Eq. (1) given the same SW AOD, the Fennec-SAL has a larger LW AOD and therefore less OLR than the AERONET PSD. In comparison with our results, the OLRs reported in the CCCM product (not shown here) are on average  $3.1 \text{ W/m}^2$  larger than CERES measurements. This warm OLR bias of CCCM product in the LW is consistent with its “too reflective” bias in the SW in Figure 8.

The LW result in *Table 4* is interesting and important. First of all, it suggests that the LW spectral region provides useful information content on dust properties that is complementary to SW. As we see from Figure 8, the Fennec-SAL PSD + Colarco-SW refractive index and

AERONET PSD + OPAC-SW SW refractive combinations yield very similar SW radiation simulations. However, only Fennec PSD can lead to reasonable LW radiation simulation. Secondly, although the main point here is more about the usefulness of the information content in LW, the fact that the coarser Fennec PSD leads to better OLR simulation than AERONET PSD and CCCM product (based on MATCH) aligns with the recent studies (e.g., Kok et al. [2017]) arguing that dust size tends to be underestimated in the aerosol simulation models.

Finally, as expected, the combination of Fennec PSD + OPAC-LW also yields the best simulation of the dust  $DRE_{LW}$ , at  $3.0 \text{ W/m}^2$ , in comparison with the result derived from the CERES OLR observations and RRTM dust-free OLR computation with ancillary data provided by CCCM product (i.e.,  $+3.4 \pm 0.32 \text{ W/m}^2$  based on CERES-CALIPSO combination).

## 4.2 Sensitivity to dust shape

In this section, we investigate the sensitivity of dust DRE to the shape (or shape distribution) of dust. For all the computations in the last section, we have used the spheroidal dust model with the aspect ratio distribution from Dubovik et al. [2006] (See Figure 4a). Now, we replace this model with another spheroidal dust model by Kandler et al. [2009] shown in Figure 4b. For comparison purpose, we also carry out another set of computation assuming spherical dust. For dust size and refractive index, we use the Fennec-SAL and Colarco-SW/OPAC-LW refractive index since dust DREs based on this combination has shown the best agreement with the observations.

In Figure 9, we compare the scattering properties of dust based on three different shape models. Overall, the two spheroidal models are very similar and both significantly different from the spherical model. More specifically, in the SW the  $Q_e$  based on spheroidal models is

significantly larger than that based on spherical dust model. In the LW it is the opposite. The  $\omega$  in Figure 9b suggest that the spherical dust is more absorptive than spheroidal dust in the SW region, when other things are equal. Figure 9d and e show the normalized the AOD with respect to AOD( $0.5 \mu m$ ) and the spectral variation of the scattering index AOD\*SSA\*(1-g). From Figure 9d we can see that given the same SW AOD, the spherical model has the larger LW AOD than the two spheroidal models. The comparison in Figure 9e reveals that the spherical dust model is less reflective than the spheroidal model in the SW.

Figure 10 shows the radiative transfer simulations for the selected cases based on the three dust shape models. The DRE<sub>sw</sub> efficiency based on the Kandler et al. [2009] is  $-48.3 \text{ W/m}^2/\text{AOD}$ , which almost identical to the  $-47.6 \text{ W/m}^2/\text{AOD}$  based on the Dubovik et al. [2006] model. In contrast, the DRE<sub>sw</sub> efficiency based on the spherical dust model is much smaller  $-39.8 \text{ W/m}^2/\text{AOD}$ , which can be expected from the results in Figure 9e (i.e., spherical dust is less reflective). Because the DRE<sub>sw</sub> efficiencies based on all three shape models are within the observation-based values, we cannot tell if the spherical dust model is better or worse than the spheroidal models.

As mentioned above, the two spheroidal dust models yield very similar OLR simulations and are both statistically indistinguishable from the CERES observations. In contrast, the OLR simulations based on the spherical dust models has a statistically significant  $-0.8 \text{ W/m}^2$  cold bias, with a p-value of 0.03 (See Table 4). Overall, the results in Figure 10 and Table 4 indicate that the two spheroidal models provide a slightly better, especially in LW, agreement with the observations. Note that different shape models may have different angular and/or spectral signature in terms of radiance, which is more important for satellite remote sensing. But this is beyond the scope of this study and will be investigated in future work.



## 5. Diurnally Mean Dust DRE in North Atlantic

The DRE computations in the last section (i.e., Table 1~ Table 3) are *instantaneous* values corresponding to the overpassing time of Aqua around 1:30PM local time. The strong solar insolation makes the instantaneous  $DRE_{SW}$  much larger than  $DRE_{LW}$  in terms of magnitude, leading to a strong negative  $DRE_{net}$  (cooling) of dust. However, the  $DRE_{SW}$  operates only during daytime, while the  $DRE_{LW}$  operates both day and night. In addition, because of the availability of satellite observations only at TOA, we have focused only on the DRE at TOA in the analyses above. To appreciate the relative magnitude of  $DRE_{LW}$  with respect to  $DRE_{SW}$  we extend our DRE simulations and analysis from *instantaneous* to *diurnal mean*, and also from TOA to surface. Over tropical ocean, the OLR is most sensitive to sea surface temperature (SST). Our sensitivity study based on the 3-hour MERRA (Modern-Era Retrospective analysis for Research and Applications) data suggests that the diurnal SST variation in the tropical North Atlantic region is so small that the diurnal mean OLR is close to the *instantaneous* value. Similarly, we also found that the diurnal variation of atmospheric profile (e.g., water vapor) has negligible impact on the diurnal  $DRE_{SW}$  computation. Therefore, we only compute the diurnal variation of  $DRE_{SW}$  due to the change of solar zenith angle and ignore the small diurnal variation of  $DRE_{LW}$  as well as the impacts of atmospheric profile change on  $DRE_{SW}$ .

Table 5 summarizes the key results of the diurnal mean  $DRE_{SW}$  and  $DRE_{SW}$  efficiency at TOA, as well as at surface. In the SW, the two most reasonable combinations of PSD and refractive index, Fennec-SAL PSD + Colarco-SW and AERONET-PSD + OPAC-SW leads to similar TOA  $DRE_{SW}$  efficiency around  $-29 \text{ W/m}^2/\text{AOD}$ , which is at the center of the  $-16 \sim -41 \text{ W/m}^2/\text{AOD}$  range reported in Yu et al. [2006]. At the surface, the  $DRE_{SW}$  efficiency based on these two combinations are around  $-83 \text{ W/m}^2/\text{AOD}$ , which is significantly stronger than the  $-27 \sim -68 \text{ W/m}^2/\text{AOD}$  range reported in Yu et al. [2006]. It should be noted that we have limited this study

to dust-dominant cases, whereas the values in Yu et al. [2006] are based on simple domain average and include other types of aerosol.

By combining the information in Table 3 and Table 5, we can easily derive the net  $DRE_{net}$  of dust in the North Atlantic during summer. The TOA  $DRE_{net}$  based on the combination of Fennec-SAL PSD + Colarco-SW + OPAC-LW refractive indices gives a regional mean  $DRE_{net}$  of  $-6.9 \text{ W/m}^2$  and  $-18.3 \text{ W/m}^2$  at TOA and surface, respectively. In comparison, the corresponding values based on the combination of AERONET PSD + OPAC-SW + OPAC-LW refractive indices are  $-8.5 \text{ W/m}^2$  and  $-22.5 \text{ W/m}^2$ , respectively. It is interesting and important to point out that the  $DRE_{LW}$  is significant, about 17% ~ 36% (depending on the choice of PSD and refractive index) in terms of magnitude with respect to the  $DRE_{sw}$ , and therefore not negligible in the  $DRE_{net}$  regardless whether for TOA or surface.

## 6. Summary and Discussions

In this study, we use A-Train satellite observations reported in the CCCM product and recent in situ measurements of dust properties to investigate the DREs of the dust aerosols in the North Atlantic African dust outflow region during summer months. First, we select about 600 cloud-free and dust-dominant CERES pixels from 5 seasons of CCCM product. Based on these cases, we first derive a set of observation-based instantaneous (corresponding to Aqua overpassing time)  $DRE_{sw}$  efficiency and  $DRE_{sw}$  using the combination of CERES-measured TOA flux and MODIS or CALIPSO retrieved dust AOD. The  $DRE_{sw}$  efficiency and  $DRE_{sw}$  based on CERES-MODIS observation are  $-49.7 \pm 7.1 \text{ W/m}^2/\text{AOD}$  and  $-14.2 \pm 2 \text{ W/m}^2$ , respectively. The values based on the CERES-CALIOP combination are  $-36.5 \pm 4.8 \text{ W/m}^2/\text{AOD}$  and  $-10.4 \pm 1.4 \text{ W/m}^2$ , respectively. Using the combination of CERES-measured OLR (i.e., with dust) and computed

dust-free OLR based on ancillary data, we also derive a set of semi-observation-based TOA  $DRE_{LW}$  between  $2.38 \sim 3.72 \text{ W/m}^2$ .

In the follow-up sensitivity study, we use the RRTM radiative transfer model to compute the DRE of dust using the observed  $0.5\mu\text{m}$  dust extinction profiles from CALIPSO under various different assumptions of dust PSD, refractive index and shape distributions. We find that two dust models, one based on Fennec-SAL PSD and Colarco-SW refractive index and the other on AERONET PSD and OPAC-SW refractive index, provide the best fit to the observation-based  $DRE_{sw}$  efficiency and  $DRE_{sw}$ . However, only the one based on the Fennec-SAL PSD, which is much coarser than the AERONET-PSD, can also provide reasonable fit to the observation-based  $DRE_{LW}$ . We also find that the DREs based on the two spheroidal dust models are quite similar to each other, but more different from those based on spherical dust, suggesting that the detailed shape distribution is less important in the calculation of dust DRE. Based on the dust model that provides the best fit to the observation-based DRE, we estimate the diurnal mean dust  $DRE_{sw}$  efficiency in the North Atlantic region during summer months (JJA) from 2007 to 2010 to be around  $-28$  and  $-82 \text{ W/m}^2/\text{AOD}$  at TOA and surface, respectively. The corresponding  $DRE_{sw}$  is  $-9.9 \text{ W/m}^2$  and  $-26 \text{ W/m}^2$  at TOA and surface, respectively. The diurnal mean  $DRE_{LW}$  is about  $3 \text{ W/m}^2$  at TOA and  $7.7 \text{ W/m}^2$  at surface. As dust aerosol properties varies temporally and spatially, DREs of dust aerosols also have high spatio-temporal variation. Therefore, it is worthy to extend the analysis to other regions and years in future studies.

Our estimation of the instantaneous TOA  $DRE_{sw}$  efficiency is in reasonable agreement with the values reported in a recent study by Mishra et al. [2017]. Their observations are from a satellite instrument similar to CERES, called Megha-Tropiques-ScaRaB (MT- ScaRaB). Flying in a low-inclination orbit, this instrument is able to observe the TOA radiation in the tropical region

at various local times. Using 4 years MT- ScaRaB radiation and MODIS AOD observation, Mishra et al. [2017] estimate that the instantaneous TOA  $DRE_{SW}$  corresponding to a solar zenith angle of  $\sim 40^\circ$  in the North Atlantic region is about  $-40 \pm 3 \text{ W/m}^2/\text{AOD}$ , which is in between our range of  $-49.7 \pm 7.1 \text{ W/m}^2/\text{AOD}$  and  $-36.5 \pm 4.8 \text{ W/m}^2/\text{AOD}$ . Our estimation of the diurnal mean TOA  $DRE_{SW}$  efficiency ( $-28 \text{ W/m}^2/\text{AOD}$ ) is in between the  $-18 \text{ W/m}^2/\text{AOD}$  reported in Mishra et al. [2017] and  $-35 \text{ W/m}^2/\text{AOD}$  reported in Li et al. [2004]. The difference may result from different selection of cases and domain. Note that our analysis is limited to cloud-free and dust-dominant cases that are selected based on MODIS and CALIOP observations.

Due to the lack of study on dust  $DRE_{LW}$  in this region, it is difficult to find a comparable result the literature to validate our estimate of  $DRE_{LW}$ . Nevertheless, our result that the positive  $DRE_{LW}$  cancels about 30% of the negative  $DRE_{SW}$  in the computation of the diurnal mean net dust DRE is in agreement with many previous studies attesting the importance of dust  $DRE_{LW}$  (e.g., Zhang et al. 2003, Haywood et al. 2005). Note that over land, e.g., the Sahara Desert, the brighter surface reflectance will reduce the cooling effect of  $DRE_{SW}$  or even leads to warming (positive)  $DRE_{SW}$ . At the same time, the hot surface temperature during daytime may result in  $DRE_{LW}$  significantly larger than that over ocean. Therefore, the  $DRE_{LW}$  is expected to be even more significant in comparison with  $DRE_{SW}$ , over land than over ocean, which is an interesting topic for future studies.

Another interesting result from this study is that given the same visible AOD dust particle size and dust absorption in the SW can compromise each other in determining dust  $DRE_{SW}$ . As a result, it is difficult to specify both variables using the SW radiation alone. In such case, the LW radiation could provide complementary and important information on dust properties, especially dust particle size. Most of the current aerosol property retrieval algorithms use only SW radiation

observations. There are also a few algorithms to retrieve dust properties using only LW radiation observation [e.g., Pierangelo et al., 2004, DeSouza-Machado et al. 2006, Peyridieu et al., 2010]. It is worth exploring in future studies the possibility and benefit of retrieving dust properties utilizing both the SW and LW observations.

Finally, as discussed in Section 3.1, because the selected region is quite cloudy, and the footprint of CERES is relatively large, the sampling rate of cloud-free and dust dominant cases is very low. An important question arises from the low sampling is whether our results are representative. More specifically, one may wonder if our cloud-free cases are also representative of the clear-sky part of those cloudy CERES pixels. To address this question, we investigated if the dust properties (e.g., AOD and dust temperature) and meteorological conditions (e.g., surface temperature and precipitable water) have any correlation with the cloud fraction. If the statistics of the dust properties and meteorological conditions from our clear-sky cases are similar to those from the cloudy cases, then our results are arguably representative of not only the clear-sky dust-dominant CERES pixels, but also the clear-sky part of cloudy dust dominant CERES pixels. To this end, we first check the AOD. This time we selected all the dust-dominant cases based on CALIOP observations regardless of the cloud fraction. Then, we divided all the cases into 5 groups according to the cloud fraction within the CERES pixel, i.e., 0~20%; 20~40% 40~60% 60~80% and >80%. As shown in Figure 11a, the dust AOD from the cloudy groups is statistically larger than that from our cloud-free cases, which also means larger  $DRE_{sw}$  if the DRE efficiency remains the same. We don't know whether other dust properties, such as size, shape and refractive index, are correlated with cloud fraction. Investigating this is extremely challenging, if not impossible, using satellite observations. We have to leave this for future studies using other types of measurements (e.g., in situ). In addition to dust AOD, we also checked the surface temperature,

the dust layer temperature (weighted by the dust extinction coefficient from CALIOP) and the total amount of water vapor in the column. These quantities are potentially important for the  $DRE_{LW}$ . As shown in the Figure 11, in terms of the surface temperature (Figure 11 b) and dust layer temperature (Figure 11 c), the cloudy dust-dominant cases are almost identical to our cloud-free dust-dominant cases. However, not surprisingly, we found that the cloud-free cases are drier than the cloudy cases (Figure 11 c). Note that, given the same dust properties, an increasing of water vapor increases the atmospheric opacity in the LW, which tends to reduce the dust  $DRE_{LW}$ . In summary, if the dust particles properties (i.e., dust size, shape and refractive index) remain the same, then the  $DRE_{sw}$  of dust in the clear-sky part of cloudy CERES pixels would be slightly larger than that based on our results because of the larger AOD. In the LW, the larger AOD of the clear-sky part of cloudy CERES pixels would lead to a larger  $DRE_{LW}$ , but on the other hand, the increased humidity under cloudy conditions counteract the effect of larger AOD. The net result is dependent on the relative importance of these two competing factors.

**Figures and Tables:**

Table 1 Observation-based instantaneous (at A-Train overpassing time) DRE and DRE<sub>sw</sub> Efficiency at the top of atmosphere (TOA). The values in the parenthesis for DRE<sub>lw</sub> are based on the assumption of 0.7 W/m<sup>2</sup> bias in our clear-sky OLR computation. See text for detail.

|                   | TOA DRE <sub>sw</sub> Efficiency<br>[W · m <sup>-2</sup> · AOD <sup>-1</sup> ] | TOA DRE <sub>sw</sub><br>[W · m <sup>-2</sup> ] | TOA DRE <sub>lw</sub><br>[W · m <sup>-2</sup> ] |
|-------------------|--------------------------------------------------------------------------------|-------------------------------------------------|-------------------------------------------------|
| CERES-MODIS AOD   | -49.7±7.1                                                                      | -14.2±2.0                                       | 3.1±0.60<br>(2.4±0.60)                          |
| CERES-CALIPSO AOD | -36.5±4.8                                                                      | -10.4±1.4                                       | 3.4±0.32<br>(2.7±0.32)                          |

Table 2 Instantaneous  $DRE_{sw}$  and  $DRE_{sw}$  Efficiency at TOA and Surface based on different dust models (e.g., PSD, refractive index, and shape).

| PSD        | Refractive Index | Shape   | TOA $DRE_{sw}$ efficiency<br>( $W/m^2/AOD_{0.5\mu m}$ ) | TOA $DRE_{sw}$<br>( $W/m^2$ ) | Surface $DRE_{sw}$ efficiency<br>( $W/m^2/AOD_{0.5\mu m}$ ) | Surface $DRE_{sw}$<br>( $W/m^2$ ) |
|------------|------------------|---------|---------------------------------------------------------|-------------------------------|-------------------------------------------------------------|-----------------------------------|
| Fennec-SAL | Colarco-SW       | Dubovik | -47.6                                                   | -13.5                         | -179.4                                                      | -51.5                             |
| AERONET    | OPAC-SW          | Dubovik | -53.3                                                   | -15.5                         | -190.1                                                      | -55.0                             |
| Fennec-SAL | Colarco-SW       | Sphere  | -39.8                                                   | -11.4                         | -200.4                                                      | -58.2                             |



Table 3 Instantaneous  $DRE_{LW}$  based on different dust models. Note that the diurnal mean values are almost identical to the instantaneous results due to small diurnal variation in the LW.

| PSD        | Refractive Index | Shape   | TOA $DRE_{LW}$ efficiency<br>( $W/m^2/AOD_{0.5\mu m}$ ) | TOA $DRE_{LW}$<br>( $W/m^2$ ) | Surface $DRE_{LW}$ efficiency<br>( $W/m^2/AOD_{0.5\mu m}$ ) | Surface $DRE_{LW}$<br>( $W/m^2$ ) |
|------------|------------------|---------|---------------------------------------------------------|-------------------------------|-------------------------------------------------------------|-----------------------------------|
| Fennec-SAL | OPAC-LW          | Dubovik | 10.5                                                    | 3.0                           | 26.9                                                        | 7.7                               |
| AERONET    | OPAC-LW          | Dubovik | 6.3                                                     | 1.8                           | 16.4                                                        | 4.7                               |
| Fennec-SAL | Di-Biagio-LW     | Dubovik | 8.4                                                     | 2.4                           | 18.9                                                        | 5.4                               |
| Fennec-SAL | OPAC-LW          | Sphere  | 12.6                                                    | 3.6                           | 32.9                                                        | 9.4                               |

Table 4 The difference in OLR between our computations and the CERES measurements for the selected dust cases. The values in the table are based on the assumption of 0.7 W/m<sup>2</sup> bias in our clear-sky OLR computation.

| PSD        | Refractive Index | Shape   | Mean Difference | Standard Deviation | T-score | P-value |
|------------|------------------|---------|-----------------|--------------------|---------|---------|
| Fennec-SAL | OPAC-LW          | Dubovik | -0.2            | 3.8                | -0.62   | 0.55    |
| Fennec-SAL | Di-Biagio-LW     | Dubovik | 0.3             | 3.7                | 0.83    | 0.41    |
| Fennec-SAL | OPAC-LW          | Kandler | -0.4            | 3.9                | -0.9    | 0.54    |
| Fennec-SAL | OPAC-LW          | Sphere  | -0.8            | 4.0                | -2.1    | 0.033   |
| AERONET    | OPAC-LW          | Dubovik | 0.9             | 3.7                | 2.36    | 0.02    |
| AERONET    | Di-Biagio-LW     | Dubovik | 1.5             | 3.7                | 3.94    | 8.5e-5  |

Table 5 Diurnally mean DRE<sub>sw</sub> and DRE<sub>sw</sub> Efficiency at TOA and Surface

| PSD        | Refractive index | Shape     | TOA DRE <sub>sw</sub> Efficiency (W/m <sup>2</sup> /AOD) | TOA DRE <sub>sw</sub> (W/m <sup>2</sup> ) | Surface DRE <sub>sw</sub> Efficiency (W/m <sup>2</sup> /AOD) | Surface DRE <sub>sw</sub> (W/m <sup>2</sup> ) |
|------------|------------------|-----------|----------------------------------------------------------|-------------------------------------------|--------------------------------------------------------------|-----------------------------------------------|
| Fennec-SAL | Colarco-SW       | Dubovik   | -28                                                      | -9.9                                      | -82.1                                                        | -26.0                                         |
| AERONET    | OPAC-SW          | Dubovik   | -29.4                                                    | -10.3                                     | -85.7                                                        | -27.2                                         |
| Fennec-SAL | Colarco-SW       | Spherical | -22.8                                                    | -8.2                                      | -89.6                                                        | -28.5                                         |

741  
742  
743  
744  
745  
746  
747  
748  
749  
750  
751  
752  
753  
754  
755  
756  
757  
758  
759  
760  
761  
762  
763  
764

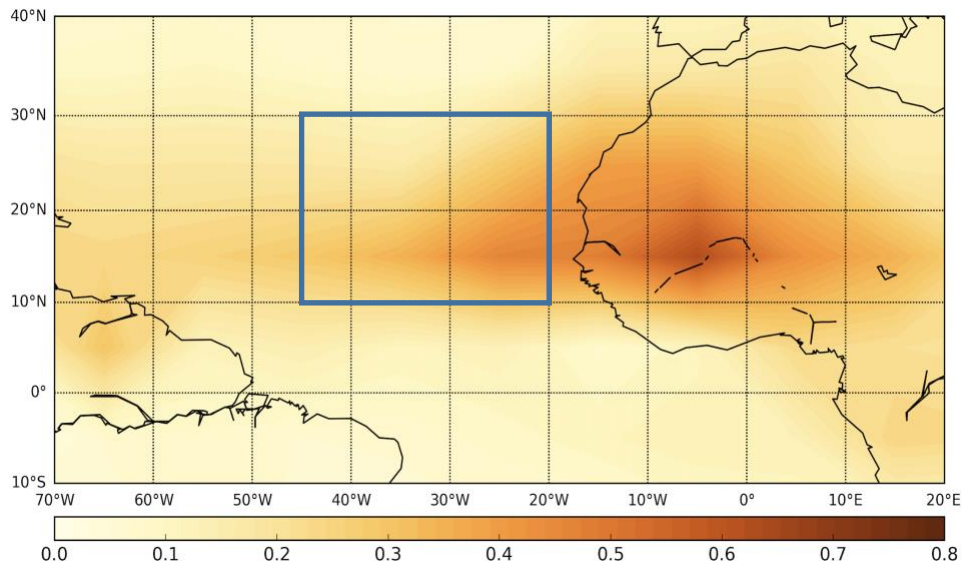

765  
766  
767  
768  
769  
770

Figure 1 CALIPSO derived seasonal mean (JJA) dust aerosol optical depth (AOD) at 0.5  $\mu\text{m}$  averaged over five summers (2007~2010) in cloud free sky condition from the integrated CALIPSO, CloudSat, CERES, MODIS merged product (CCCM).

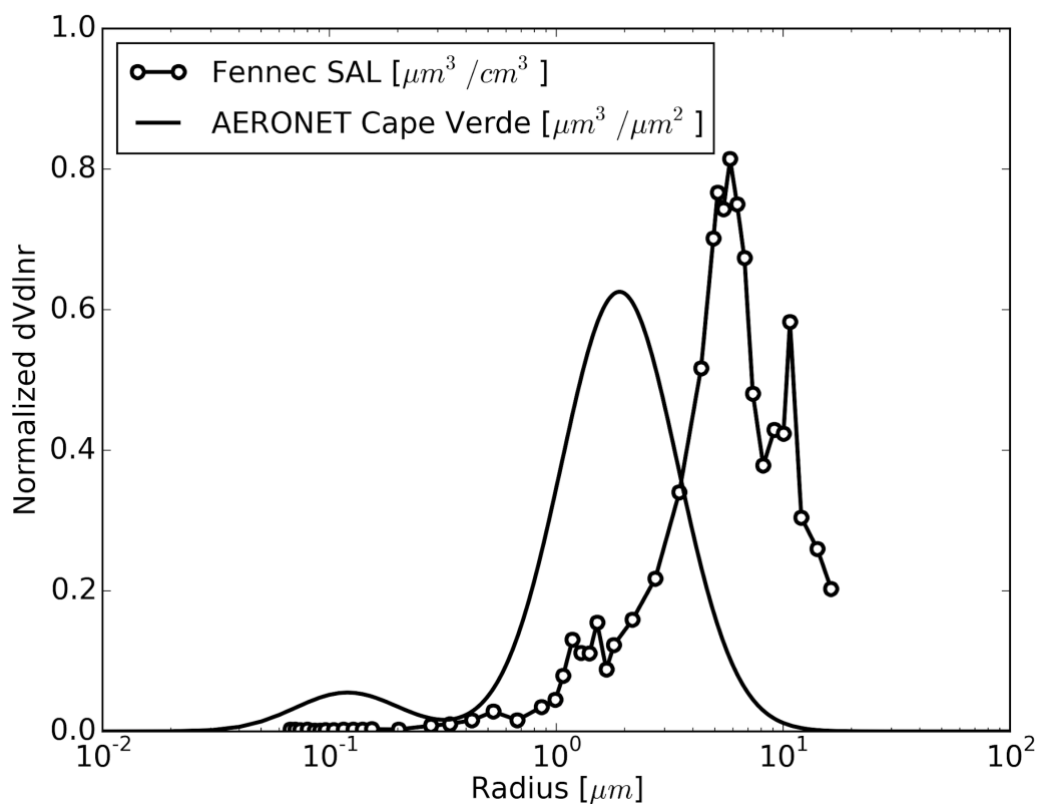

Figure 2 Size distributions of mineral dust used in this study. Fennec-SAL curve is from a new in-situ measurement of Saharan dust taken during the Fennec 2011 aircraft campaign [Ryder et al. 2013]. The solid curve represents desert dust size distribution retrieved from AERONET observations at Cape Verde site reported in Dubovik et al. [2002].

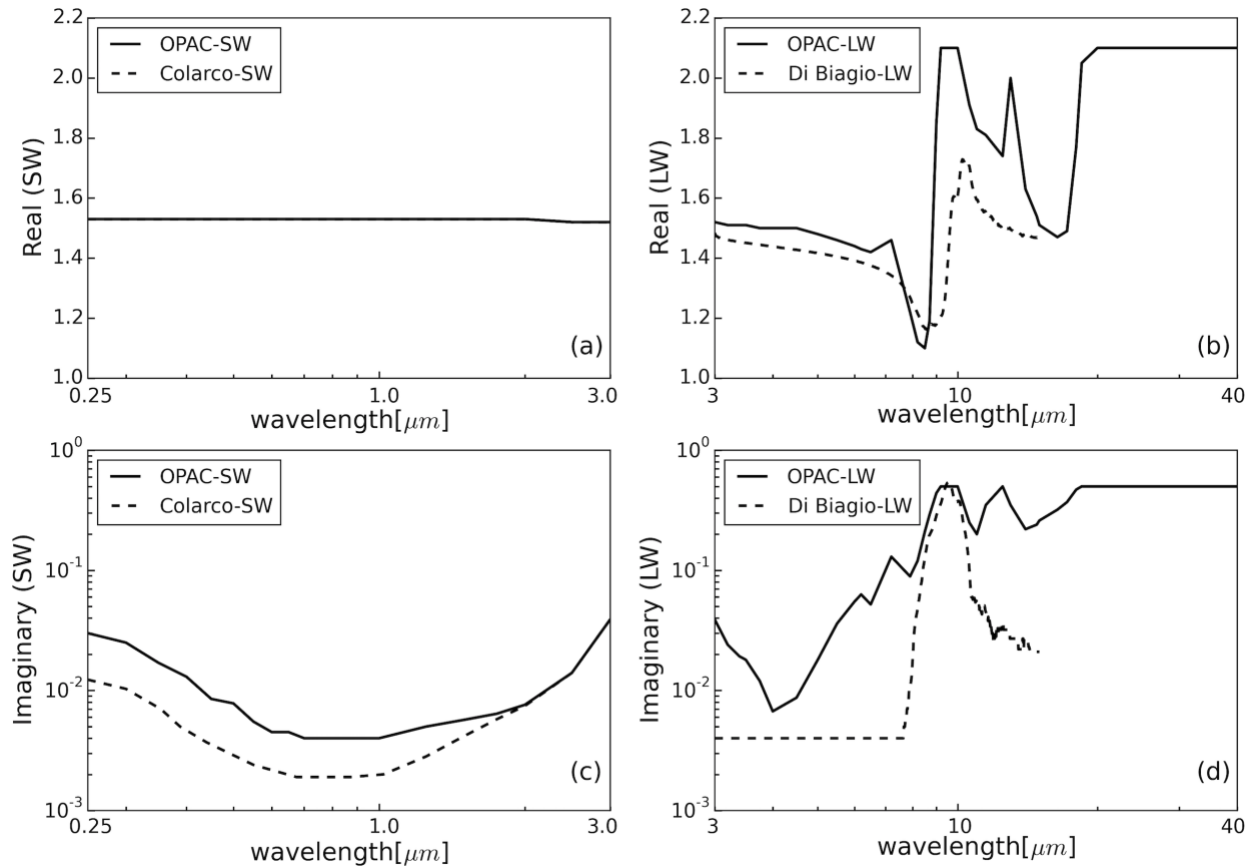

Figure 3 a) real and b) imaginary part of the SW dust refractive index from OPAC [Hess et al. 1998] and Colarco et al. [2014]; c) real and d) imaginary part of the LW dust refractive index from OPAC [Hess et al. 1998] and Di Biagio et al. [2017].

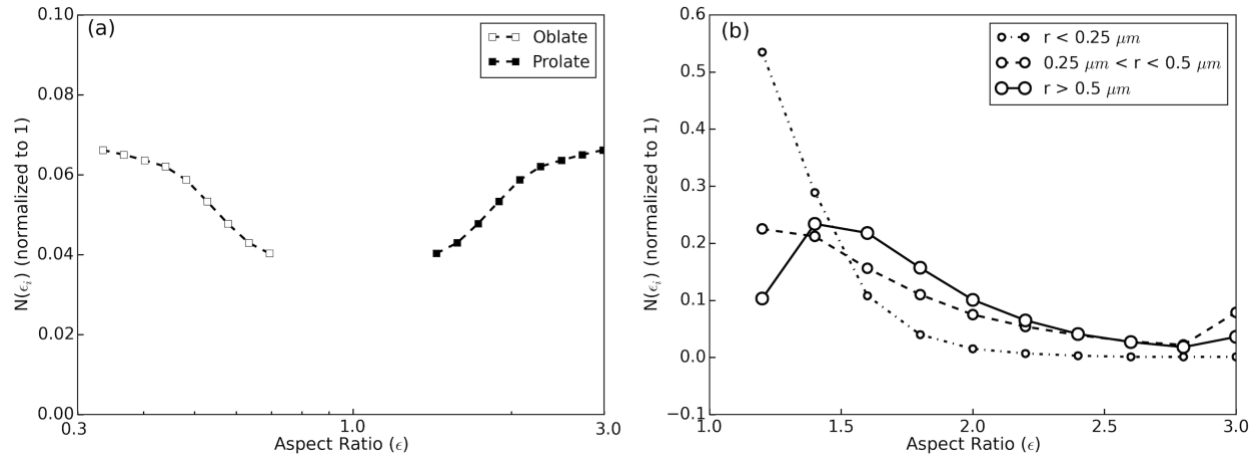

Figure 4 Two spheroidal dust shape distributions models a) shows aspect ratio distributions from Dubovik et al. [2006]. The  $\ln \epsilon$ -interval is 0.09. b) shows aspect ratio distributions as function of particle radius interval discretized from measurement of Kandler et al. (2009). The first point of each line covers the measurement data from  $\epsilon=1.0$  to 1.3, the last point of each line covers  $\epsilon > 2.9$  and the other points cover  $\epsilon$ -intervals of 0.2 Koepke et al. [2015].

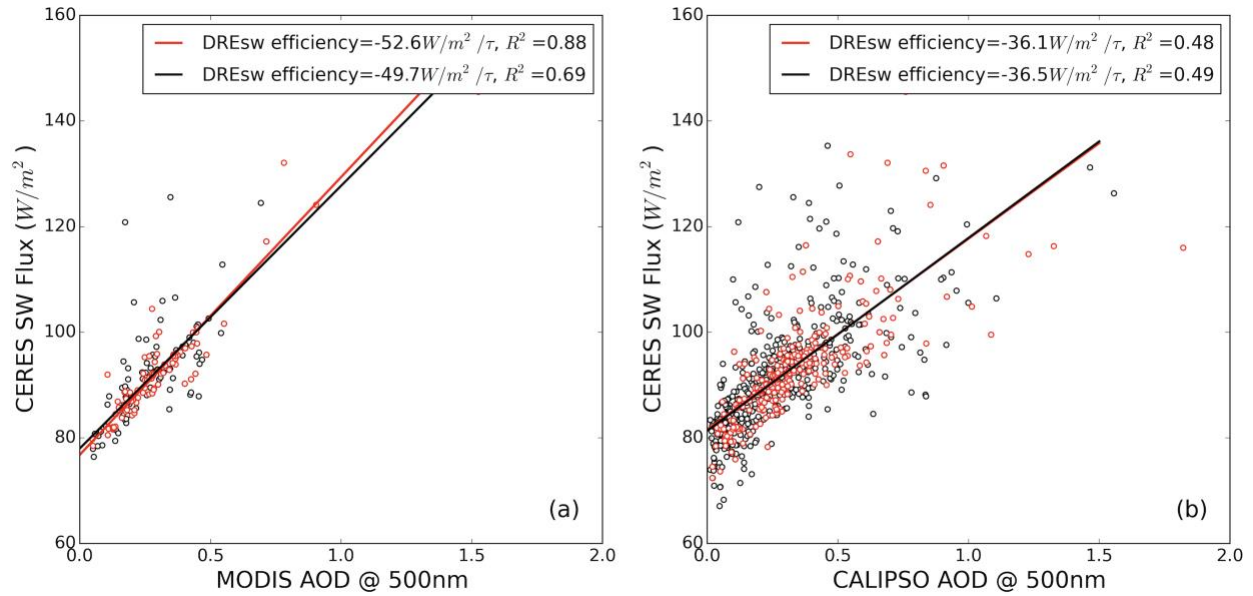

Figure 5 Linear regressions of CERES measured upward SW flux at TOA with satellite retrieved AOD for the selected cloud-free and dust dominant cases (Black points represent the cases selected using CALIPSO cloud mask along the ground track, red points represent the cases selected using MODIS cloud mask over the entire CERES footprint). a) shows the regression results based on MODIS AOD for cases (153 black points and 87 red points) with MODIS AOD retrievals. b) is for all cases (607 black points and 245 red points) with CALIPSO AOD retrievals.



846  
847

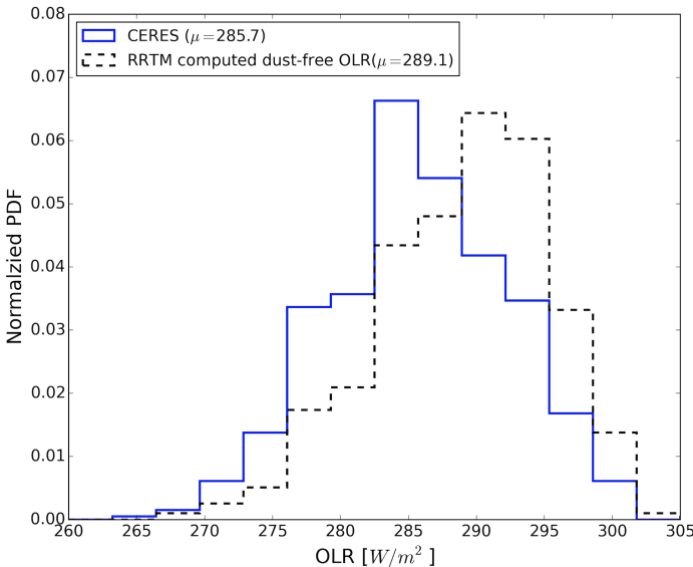

848  
849  
850  
851

Figure 6 PDF of observed OLR from CERES (i.e., with dust) and computed dust-free OLR based on the atmospheric profiles and surface temperature reported in CCCM.

852  
853

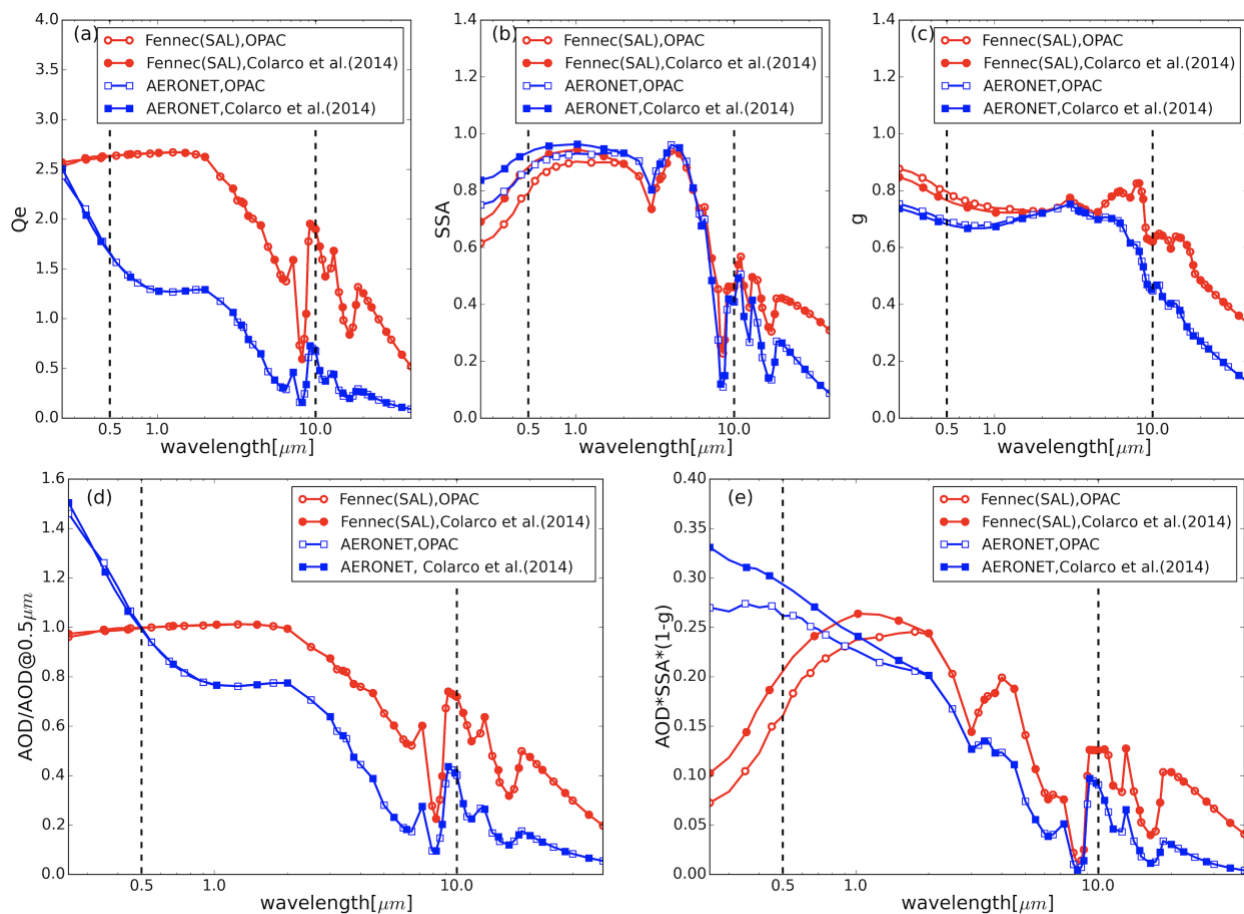

Figure 7 a) Extinction efficiency ( $Q_e$ ), b) single scattering albedo (SSA), c) asymmetry factor ( $g$ ) d) normalized AOD with respect to AOD @ 0.5 μm, and e)  $AOD*SSA*(1-g)$  of dust aerosols based on different combination of PSD and refractive index. PSD type and refractive index type are indicated in legends.

872  
873

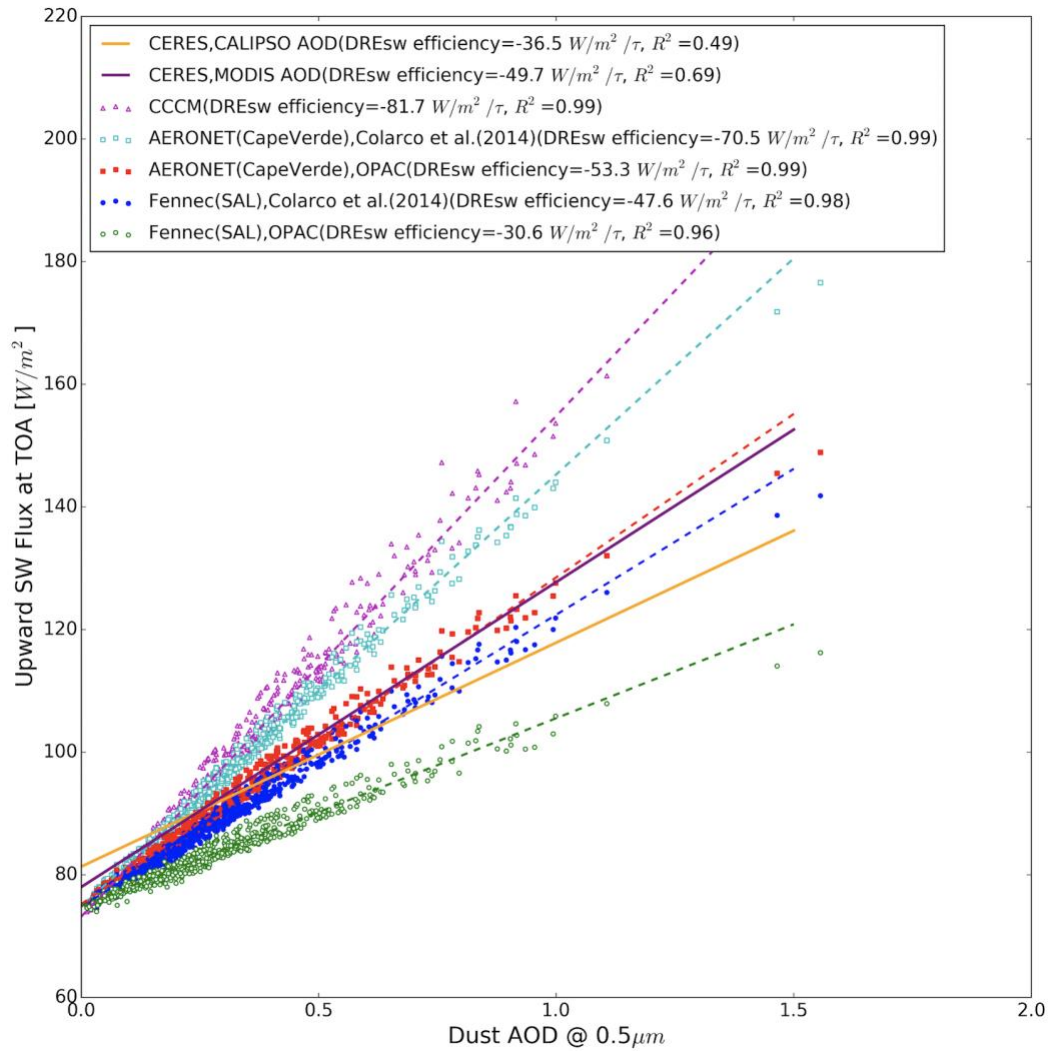

874  
875  
876  
877  
878  
879  
880  
881  
882  
883  
884  
885  
886  
887  
888  
889  
890

Figure 8 The four sets of simulated TOA upward SW fluxes as a function of the input AOD at 0.5 μm. For comparison purpose, the DREsw efficiency regression results based on observations in Figure 5, as well as the results reported in the CCCM products, are also plotted.

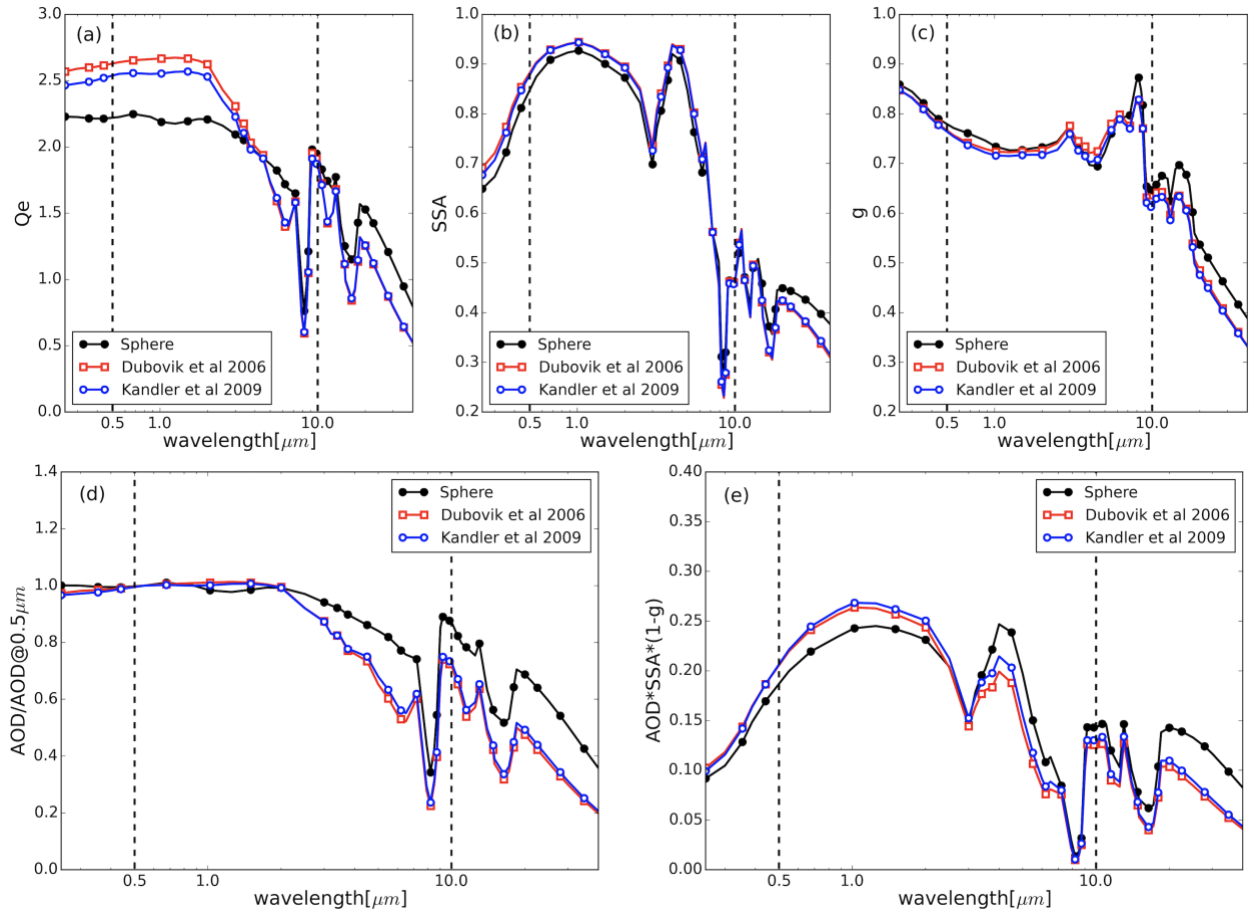

Figure 9 Extinction efficiency ( $Q_e$ ), b) single scattering albedo (SSA), c) asymmetry factor ( $g$ ) d) normalized AOD with respect to AOD @ 0.5 μm, and e)  $AOD \cdot SSA \cdot (1-g)$  of dust aerosols based on different combination of PSD and refractive index. PSD type and refractive index type are indicated in legends.

913

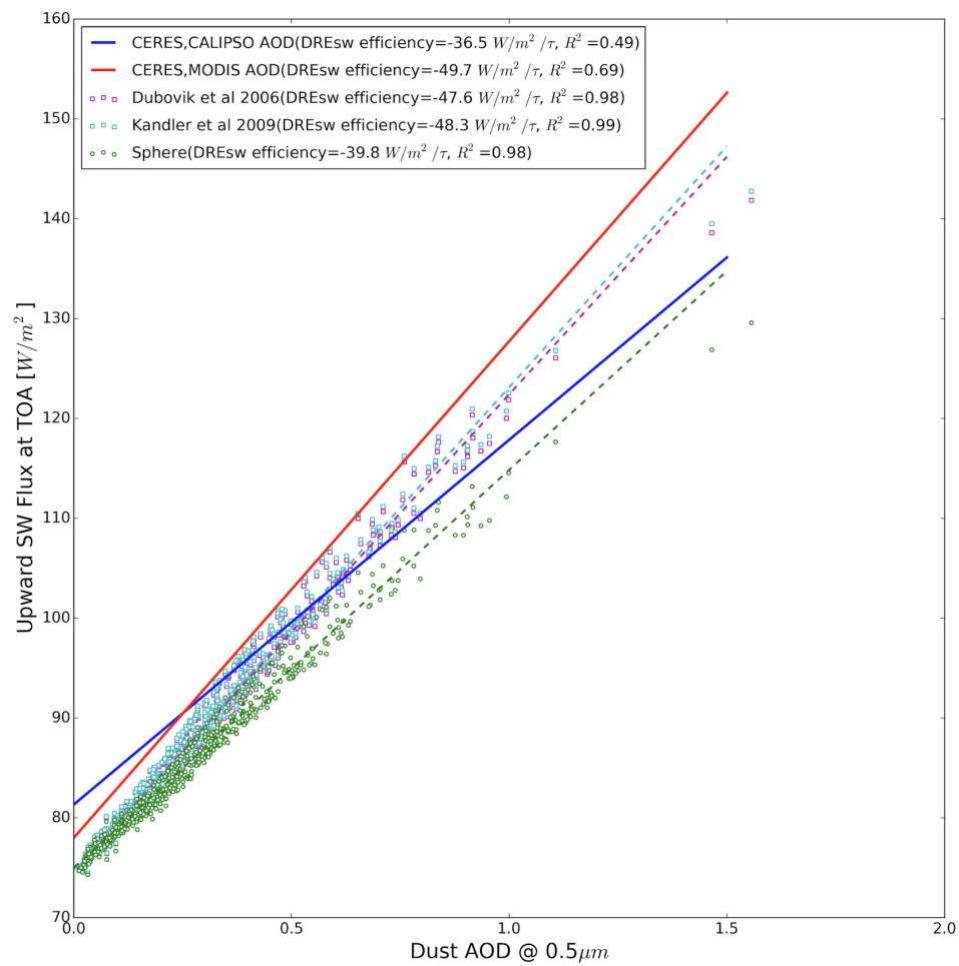

914

915

916

917

*Figure 10 shows the radiative transfer simulations for the selected cases based on the three dust shape models.*

918

919

920

921

922

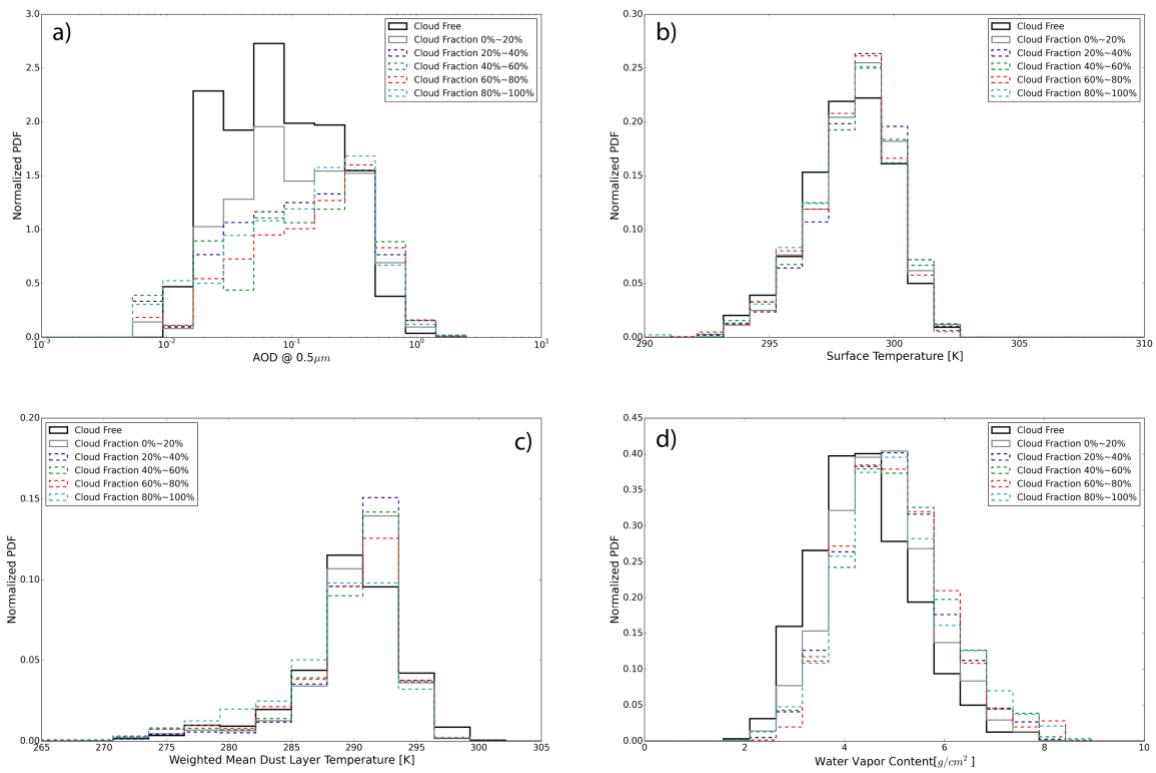

Figure 11 Histograms of a) dust AOD, b) surface temperature c) dust temperature and d) total column water vapor of dust dominant CERES pixels with different cloud fractions.

928  
929  
930

## 931 **References:**

- 932 Ackerman, A. S., Toon, O. B., Stevens, D. E., et al., "Reduction of tropical cloudiness by soot",  
933 Science, **288**, 5468, 1042-1047, (2000), doi:DOI 10.1126/science.288.5468.1042.
- 934 Ackerman, S. A., Strabala, K. I., Menzel, W. P., et al., "Discriminating clear sky from clouds  
935 with MODIS", Journal of Geophysical Research-Atmospheres, **103**, D24, 32141-32157,  
936 (1998), doi:Doi 10.1029/1998jd200032.
- 937 Albrecht, B. A., "Aerosols, Cloud Microphysics, and Fractional Cloudiness", Science, **245**, 4923,  
938 1227-1230, (1989), doi:DOI 10.1126/science.245.4923.1227.
- 939 Balkanski, Y., Schulz, M., Claquin, T. and Guibert, S., "Reevaluation of Mineral aerosol  
940 radiative forcings suggests a better agreement with satellite and AERONET data",  
941 Atmospheric Chemistry and Physics, **7**, 81-95, (2007), doi:DOI 10.5194/acp-7-81-2007.
- 942 Boucher, O., D. Randall, P. Artaxo, C. Bretherton, G. Feingold, P. Forster, V.-M. Kerminen, Y.  
943 Kondo, H. Liao, U. Lohmann, P. Rasch, S.K. Satheesh, S. Sherwood, B. Stevens and  
944 X.Y. Zhang, 2013: Clouds and Aerosols. In: Climate Change 2013: The Physical Science  
945 Basis. Contribution of Working Group I to the Fifth Assessment Report of the  
946 Intergovernmental Panel on Climate Change [Stocker, T.F., D. Qin, G.-K. Plattner, M.  
947 Tignor, S.K. Allen, J. Boschung, A. Nauels, Y. Xia, V. Bex and P.M. Midgley (eds.)].  
948 Cambridge University Press, Cambridge, United Kingdom and New York, NY, USA.
- 949 Carlson, T. N. and Benjamin, S. G., "Radiative Heating Rates for Saharan Dust", Journal of the  
950 Atmospheric Sciences, **37**, 1, 193-213, (1980), doi:Doi 10.1175/1520-  
951 0469(1980)037<0193:Rhrfsd>2.0.Co;2.
- 952 Cess, R. D., "Nuclear-War - Illustrative Effects of Atmospheric Smoke and Dust Upon Solar-  
953 Radiation", Climatic Change, **7**, 2, 237-251, (1985), doi:Doi 10.1007/Bf00140508.
- 954 Choobari, O. A., P. Zawar-Reza and Sturman, A., "The global distribution of mineral dust and its  
955 impacts on the climate system: A review", Atmospheric Research, **138**, 152-165, (2014),  
956 doi:10.1016/j.atmosres.2013.11.007.
- 957 Colarco, P. R., Nowottnick, E. P., Randles, C. A., et al., "Impact of radiatively interactive dust  
958 aerosols in the NASA GEOS-5 climate model: Sensitivity to dust particle shape and  
959 refractive index", Journal of Geophysical Research-Atmospheres, **119**, 2, 753-786,  
960 (2014), doi:10.1002/2013jd020046.
- 961 Colarco, P. R., Toon, O. B., Torres, O. and Rasch, P. J., "Determining the UV imaginary index  
962 of refraction of Saharan dust particles from Total Ozone Mapping Spectrometer data  
963 using a three-dimensional model of dust transport", Journal of Geophysical Research-  
964 Atmospheres, **107**, D16, (2002), doi:Artn 4289 10.1029/2001jd000903.
- 965 Collins, W. D., Rasch, P. J., Eaton, B. E., et al., "Simulating aerosols using a chemical transport  
966 model with assimilation of satellite aerosol retrievals: Methodology for INDOEX",  
967 Journal of Geophysical Research-Atmospheres, **106**, D7, 7313-7336, (2001), doi:Doi  
968 10.1029/2000jd900507.
- 969 Cuesta, J., Marsham, J. H., Parker, D. J. and Flamant, C., "Dynamical mechanisms controlling  
970 the vertical redistribution of dust and the thermodynamic structure of the West Saharan  
971 atmospheric boundary layer during summer", Atmospheric Science Letters, **10**, 1, 34-42,  
972 (2009), doi:10.1002/asl.207.

- DeSouza-Machado, S. G., Strow, L. L., Hannon, S. E. and Motteler, H. E., "Infrared dust spectral signatures from AIRS", *Geophysical Research Letters*, **33**, 3, (2006), doi:Artn L03801 10.1029/2005gl024364.
- Di Biagio, C., Formenti, P., Balkanski, Y., et al., "Global scale variability of the mineral dust long-wave refractive index: a new dataset of in situ measurements for climate modeling and remote sensing", *Atmospheric Chemistry and Physics*, **17**, 3, 1901-1929, (2017), doi:10.5194/acp-17-1901-2017.
- Di Biagio, C., Formenti, P., Styler, S. A., Pangu, E. and Doussin, J. F., "Laboratory chamber measurements of the longwave extinction spectra and complex refractive indices of African and Asian mineral dusts", *Geophysical Research Letters*, **41**, 17, 6289-6297, (2014), doi:10.1002/2014gl060213.
- Dubovik, O., Holben, B., Eck, T. F., et al., "Variability of absorption and optical properties of key aerosol types observed in worldwide locations", *Journal of the Atmospheric Sciences*, **59**, 3, 590-608, (2002), doi:Doi 10.1175/1520-0469(2002)059<0590:Voaaop>2.0.Co;2.
- Dubovik, O., Sinyuk, A., Lapyonok, T., et al., "Application of spheroid models to account for aerosol particle nonsphericity in remote sensing of desert dust", *Journal of Geophysical Research-Atmospheres*, **111**, D11, (2006), doi:Artn D11208 10.1029/2005jd006619.
- Evan, A. T., Dunion, J., Foley, J. A., Heidinger, A. K. and Velden, C. S., "New evidence for a relationship between Atlantic tropical cyclone activity and African dust outbreaks", *Geophysical Research Letters*, **33**, 19, (2006), doi:Artn L19813 10.1029/2006gl026408.
- Formenti, P., Schutz, L., Balkanski, Y., et al., "Recent progress in understanding physical and chemical properties of African and Asian mineral dust", *Atmospheric Chemistry and Physics*, **11**, 16, 8231-8256, (2011), doi:10.5194/acp-11-8231-2011.
- Fouquart, Y., Bonnel, B., Brogniez, G., et al., "Observations of Saharan Aerosols - Results of Eclats Field Experiment .2. Broad-Band Radiative Characteristics of the Aerosols and Vertical Radiative Flux Divergence", *Journal of Climate and Applied Meteorology*, **26**, 1, 38-52, (1987), doi:10.1175/1520-0450(1987)026<0038:Oosaro>2.0.Co;2.
- Hansen, J., Sato, M. and Ruedy, R., "Radiative forcing and climate response", *Journal of Geophysical Research-Atmospheres*, **102**, D6, 6831-6864, (1997), doi:Doi 10.1029/96jd03436.
- Hess, M., Koepke, P. and Schult, I., "Optical properties of aerosols and clouds: The software package OPAC", *Bulletin of the American Meteorological Society*, **79**, 5, 831-844, (1998), doi:Doi 10.1175/1520-0477(1998)079<0831:Opoaac>2.0.Co;2.
- Holz, R. E., Ackerman, S. A., Nagle, F. W., et al., "Global Moderate Resolution Imaging Spectroradiometer (MODIS) cloud detection and height evaluation using CALIOP", *Journal of Geophysical Research-Atmospheres*, **113**, (2008), doi:Artn D00a19 10.1029/2008jd009837.
- Hsu, N. C., Herman, J. R. and Weaver, C., "Determination of radiative forcing of Saharan dust using combined TOMS and ERBE data", *Journal of Geophysical Research-Atmospheres*, **105**, D16, 20649-20661, (2000), doi:Doi 10.1029/2000jd900150.
- Jickells, T. D., An, Z. S., Andersen, K. K., et al., "Global iron connections between desert dust, ocean biogeochemistry, and climate", *Science*, **308**, 5718, 67-71, (2005), doi:DOI 10.1126/science.1105959.



- Kandler, K., Schutz, L., Deutscher, C., et al., "Size distribution, mass concentration, chemical and mineralogical composition and derived optical parameters of the boundary layer aerosol at Tinfou, Morocco, during SAMUM 2006", *Tellus Series B-Chemical and Physical Meteorology*, **61**, 1, 32-50, (2009), doi:10.1111/j.1600-0889.2008.00385.x.
- Karyampudi, V. M., Palm, S. P., Reagen, J. A., et al., "Validation of the Saharan dust plume conceptual model using lidar, Meteosat, and ECMWF data", *Bulletin of the American Meteorological Society*, **80**, 6, 1045-1075, (1999), doi:Doi 10.1175/1520-0477(1999)080<1045:Votsdp>2.0.Co;2.
- Kato, S., Rose, F. G., Sun-Mack, S., et al., "Improvements of top-of-atmosphere and surface irradiance computations with CALIPSO-, CloudSat-, and MODIS-derived cloud and aerosol properties", *Journal of Geophysical Research-Atmospheres*, **116**, (2011), doi:Artn D19209 10.1029/2011jd016050.
- Kato, S., Sun-Mack, S., Miller, W. F., et al., "Relationships among cloud occurrence frequency, overlap, and effective thickness derived from CALIPSO and CloudSat merged cloud vertical profiles", *Journal of Geophysical Research-Atmospheres*, **115**, (2010), doi:Artn D00h28 10.1029/2009jd012277.
- Keil, A. and Haywood, J. M., "Solar radiative forcing by biomass burning aerosol particles during SAFARI 2000: A case study based on measured aerosol and cloud properties", *Journal of Geophysical Research-Atmospheres*, **108**, D13, (2003), doi:Artn 8467 10.1029/2002jhd002315.
- Kim, M. H., Kim, S. W., Yoon, S. C. and Omar, A. H., "Comparison of aerosol optical depth between CALIOP and MODIS-Aqua for CALIOP aerosol subtypes over the ocean", *Journal of Geophysical Research-Atmospheres*, **118**, 23, 13241-13252, (2013), doi:10.1002/2013jd019527.
- Koepke, P., Gasteiger, J. and Hess, M., "Technical Note: Optical properties of desert aerosol with non-spherical mineral particles: data incorporated to OPAC", *Atmospheric Chemistry and Physics*, **15**, 10, 5947-5956, (2015), doi:10.5194/acp-15-5947-2015.
- Kok, J. F., Ridley, D. A., Zhou, Q., et al., "Smaller desert dust cooling effect estimated from analysis of dust size and abundance", *Nature Geoscience*, **10**, 4, 274-+, (2017), doi:10.1038/Ngeo2912.
- Koren, I., Kaufman, Y. J., Remer, L. A. and Martins, J. V., "Measurement of the effect of Amazon smoke on inhibition of cloud formation", *Science*, **303**, 5662, 1342-1345, (2004), doi:DOI 10.1126/science.1089424.
- Lau, K. M. and Kim, K. M., "Cooling of the Atlantic by Saharan dust", *Geophysical Research Letters*, **34**, 23, (2007), doi:Artn L23811 10.1029/2007gl031538.
- Levoni, C., Cervino, M., Guzzi, R. and Torricella, F., "Atmospheric aerosol optical properties: a database of radiative characteristics for different components and classes", *Applied Optics*, **36**, 30, 8031-8041, (1997), doi:Doi 10.1364/Ao.36.008031.
- Levy, R. C., Remer, L. A., Mattoo, S., Vermote, E. F. and Kaufman, Y. J., "Second-generation operational algorithm: Retrieval of aerosol properties over land from inversion of Moderate Resolution Imaging Spectroradiometer spectral reflectance", *Journal of Geophysical Research-Atmospheres*, **112**, D13, (2007), doi:Artn D13211 10.1029/2006jd007811.
- Li, F., Vogelmann, A. M. and Ramanathan, V., "Saharan dust aerosol radiative forcing measured from space", *Journal of Climate*, **17**, 13, 2558-2571, (2004), doi:Doi 10.1175/1520-0442(2004)017<2558:Sdarfm>2.0.Co;2.

- Liao, H. and Seinfeld, J. H., "Radiative forcing by mineral dust aerosols: sensitivity to key variables", *Journal of Geophysical Research-Atmospheres*, **103**, D24, 31637-31645, (1998), doi:10.1029/1998jd200036.
- Liu, Z. Y., Omar, A., Vaughan, M., et al., "CALIPSO lidar observations of the optical properties of Saharan dust: A case study of long-range transport", *Journal of Geophysical Research-Atmospheres*, **113**, D7, (2008), doi:Artn D07207 10.1029/2007jd008878.
- Ma, X., Bartlett, K., Harmon, K. and Yu, F., "Comparison of AOD between CALIPSO and MODIS: significant differences over major dust and biomass burning regions", *Atmospheric Measurement Techniques*, **6**, 9, 2391-2401, (2013), doi:10.5194/amt-6-2391-2013.
- Mahowald, N., Albani, S., Kok, J. F., et al., "The size distribution of desert dust aerosols and its impact on the Earth system", *Aeolian Research*, **15**, 53-71, (2014), doi:10.1016/j.aeolia.2013.09.002.
- Maring, H., Savoie, D. L., Izaguirre, M. A., Custals, L. and Reid, J. S., "Mineral dust aerosol size distribution change during atmospheric transport", *Journal of Geophysical Research-Atmospheres*, **108**, D19, (2003), doi:Artn 8592 10.1029/2002jd002536.
- McCormick, R. A. and Ludwig, J. H., "Climate Modification by Atmospheric Aerosols", *Science*, **156**, 3780, 1358+, (1967), doi:DOI 10.1126/science.156.3780.1358.
- Meng, Z. K., Yang, P., Kattawar, G. W., et al., "Single-scattering properties of tri-axial ellipsoidal mineral dust aerosols: A database for application to radiative transfer calculations", *Journal of Aerosol Science*, **41**, 5, 501-512, (2010), doi:10.1016/j.jaerosci.2010.02.008.
- Miller, R. L. and Tegen, I., "Climate response to soil dust aerosols", *Journal of Climate*, **11**, 12, 3247-3267, (1998), doi:Doi 10.1175/1520-0442(1998)011<3247:Crtsda>2.0.Co;2.
- Mishchenko, M. I., Travis, L. D., Kahn, R. A. and West, R. A., "Modeling phase functions for dustlike tropospheric aerosols using a shape mixture of randomly oriented polydisperse spheroids", *Journal of Geophysical Research-Atmospheres*, **102**, D14, 16831-16847, (1997), doi:Doi 10.1029/96jd02110.
- Mishra, M. K., Gupta, A. K. and Rajeev, K., "Spaceborne Observations of the Diurnal Variation of Shortwave Aerosol Direct Radiative Effect at Top of Atmosphere Over the Dust-Dominated Arabian Sea and the Atlantic Ocean", *Ieee Transactions on Geoscience and Remote Sensing*, **55**, 11, 6610-6616, (2017), doi:10.1109/Tgrs.2017.2730758.
- Mlawer, E. J., Taubman, S. J., Brown, P. D., Iacono, M. J. and Clough, S. A., "Radiative transfer for inhomogeneous atmospheres: RRTM, a validated correlated-k model for the longwave", *Journal of Geophysical Research-Atmospheres*, **102**, D14, 16663-16682, (1997), doi:Doi 10.1029/97jd00237.
- Myhre, G., Grini, A., Haywood, J. M., et al., "Modeling the radiative impact of mineral dust during the Saharan Dust Experiment (SHADE) campaign", *Journal of Geophysical Research-Atmospheres*, **108**, D18, (2003), doi:Artn 8579 10.1029/2002jd002566.
- Peyridieu, S., Chedin, A., Tanre, D., et al., "Saharan dust infrared optical depth and altitude retrieved from AIRS: a focus over North Atlantic - comparison to MODIS and CALIPSO", *Atmospheric Chemistry and Physics*, **10**, 4, 1953-1967, (2010), doi:10.5194/acp-10-1953-2010.
- Pierangelo, C., Chedin, A., Heilliette, S., Jacquinet-Husson, N. and Armante, R., "Dust altitude and infrared optical depth from AIRS", *Atmospheric Chemistry and Physics*, **4**, 1813-1822, (2004), doi:10.5194/acp-4-1813-2004.

- Platnick, S., King, M. D., Ackerman, S. A., et al., "The MODIS cloud products: Algorithms and examples from Terra", *Ieee Transactions on Geoscience and Remote Sensing*, **41**, 2, 459-473, (2003), doi:10.1109/Tgrs.2002.808301.
- Rajot, J. L., Formenti, P., Alfaro, S., et al., "AMMA dust experiment: An overview of measurements performed during the dry season special observation period (SOP0) at the Banizoumbou (Niger) supersite", *Journal of Geophysical Research-Atmospheres*, **113**, D20, (2008), doi:Artn D00c14 10.1029/2008jd009906.
- Ramaswamy, V. and Kiehl, J. T., "Sensitivities of the Radiative Forcing Due to Large Loadings of Smoke and Dust Aerosols", *Journal of Geophysical Research-Atmospheres*, **90**, Nd3, 5597-5613, (1985), doi:DOI 10.1029/JD090iD03p05597.
- Remer, L. A., Kaufman, Y. J., Tanre, D., et al., "The MODIS aerosol algorithm, products, and validation", *Journal of the Atmospheric Sciences*, **62**, 4, 947-973, (2005), doi:Doi 10.1175/Jas3385.1.
- Rienecker, M. M., Suarez, M. J., Todling, R., et al., " The GEOS-5 data assimilation system - Documentation of versions 5.0.1, 5.1.0, and 5.2.0", *NASA Tech. Memo.*, **27**, (2008).
- Rosenfeld, D. and Lensky, I. M., "Satellite-based insights into precipitation formation processes in continental and maritime convective clouds", *Bulletin of the American Meteorological Society*, **79**, 11, 2457-2476, (1998), doi:Doi 10.1175/1520-0477(1998)079<2457:Sbiipf>2.0.Co;2.
- Ryder, C. L., Highwood, E. J., Lai, T. M., Sodemann, H. and Marsham, J. H., "Impact of atmospheric transport on the evolution of microphysical and optical properties of Saharan dust", *Geophysical Research Letters*, **40**, 10, 2433-2438, (2013a), doi:10.1002/grl.50482.
- Ryder, C. L., Highwood, E. J., Rosenberg, P. D., et al., "Optical properties of Saharan dust aerosol and contribution from the coarse mode as measured during the Fennec 2011 aircraft campaign", *Atmospheric Chemistry and Physics*, **13**, 1, 303-325, (2013b), doi:10.5194/acp-13-303-2013.
- Sokolik, I. N. and Toon, O. B., "Direct radiative forcing by anthropogenic airborne mineral aerosols", *Nature*, **381**, 6584, 681-683, (1996), doi:DOI 10.1038/381681a0.
- Sokolik, I. N. and Toon, O. B., "Incorporation of mineralogical composition into models of the radiative properties of mineral aerosol from UV to IR wavelengths", *Journal of Geophysical Research-Atmospheres*, **104**, D8, 9423-9444, (1999), doi:Doi 10.1029/1998jd200048.
- Sokolik, I. N., Toon, O. B. and Bergstrom, R. W., "Modeling the radiative characteristics of airborne mineral aerosols at infrared wavelengths", *Journal of Geophysical Research-Atmospheres*, **103**, D8, 8813-8826, (1998), doi:Doi 10.1029/98jd00049.
- Stegmann, P. G. and Yang, P., "A regional, size-dependent, and causal effective medium model for Asian and Saharan mineral dust refractive index spectra", *Journal of Aerosol Science*, **114**, 327-341, (2017), doi:10.1016/j.jaerosci.2017.10.003.
- Tegen, I. and Lacis, A. A., "Modeling of particle size distribution and its influence on the radiative properties of mineral dust aerosol", *Journal of Geophysical Research-Atmospheres*, **101**, D14, 19237-19244, (1996), doi:Doi 10.1029/95jd03610.
- Tegen, I., Lacis, A. A. and Fung, I., "The influence on climate forcing of mineral aerosols from disturbed soils", *Nature*, **380**, 6573, 419-422, (1996), doi:10.1038/380419a0.
- Textor, C., Schulz, M., Guibert, S., et al., "Analysis and quantification of the diversities of aerosol life cycles within AeroCom", *Atmospheric Chemistry and Physics*, **6**, 1777-1813, (2006).

- Twomey, S., "The influence of pollution on the shortwave albedo of clouds", *Journal of the atmospheric sciences*, **34**, 7, 1149-1152, (1977).
- Volz, F. E., "Infrared Optical-Constants of Ammonium Sulfate, Sahara Dust, Volcanic Pumice, and Flyash", *Applied Optics*, **12**, 3, 564-568, (1973), doi:10.1364/Ao.12.000564.
- Volz, F. E., "Infrared Refractive-Index of Atmospheric Aerosol Substances", *Applied Optics*, **11**, 4, 755-759, (1972), doi:10.1364/Ao.11.000755.
- Washington, R., Todd, M., Middleton, N. J. and Goudie, A. S., "Dust-storm source areas determined by the total ozone monitoring spectrometer and surface observations", *Annals of the Association of American Geographers*, **93**, 2, 297-313, (2003), doi:10.1111/1467-8306.9302003.
- Weinzierl, B., Ansmann, A., Prospero, J. M., et al., "THE SAHARAN AEROSOL LONG-RANGE TRANSPORT AND AEROSOL-CLOUD-INTERACTION EXPERIMENT Overview and Selected Highlights", *Bulletin of the American Meteorological Society*, **98**, 7, 1427-1451, (2017), doi:10.1175/Bams-D-15-00142.1.
- Weinzierl, B., Sauer, D., Esselborn, M., et al., "Microphysical and optical properties of dust and tropical biomass burning aerosol layers in the Cape Verde region-an overview of the airborne in situ and lidar measurements during SAMUM-2", *Tellus Series B-Chemical and Physical Meteorology*, **63**, 4, 589-618, (2011), doi:10.1111/j.1600-0889.2011.00566.x.
- Winker, D. M., Pelon, J., Coakley, J. A., et al., "THE CALIPSO MISSION A Global 3D View of Aerosols and Clouds", *Bulletin of the American Meteorological Society*, **91**, 9, 1211-1229, (2010), doi:10.1175/2010bams3009.1.
- Wiscombe, W. J., "Improved Mie Scattering Algorithms", *Applied Optics*, **19**, 9, 1505-1509, (1980), doi:10.1364/Ao.19.001505.
- Xu, H., Guo, J. P., Wang, Y., et al., "Warming effect of dust aerosols modulated by overlapping clouds below", *Atmospheric Environment*, **166**, 393-402, (2017), doi:10.1016/j.atmosenv.2017.07.036.
- Yang, E. S., Gupta, P. and Christopher, S. A., "Net radiative effect of dust aerosols from satellite measurements over Sahara", *Geophysical Research Letters*, **36**, (2009), doi:10.1029/2009gl039801.
- Yu, H., Kaufman, Y. J., Chin, M., et al., "A review of measurement-based assessments of the aerosol direct radiative effect and forcing", *Atmospheric Chemistry and Physics*, **6**, 613-666, (2006).
- Yu, H. B., Chin, M., Yuan, T. L., et al., "The fertilizing role of African dust in the Amazon rainforest: A first multiyear assessment based on data from Cloud-Aerosol Lidar and Infrared Pathfinder Satellite Observations", *Geophysical Research Letters*, **42**, 6, 1984-1991, (2015), doi:10.1002/2015gl063040.
- Zhang, Z. B., Meyer, K., Yu, H. B., et al., "Shortwave direct radiative effects of above-cloud aerosols over global oceans derived from 8 years of CALIOP and MODIS observations", *Atmospheric Chemistry and Physics*, **16**, 5, 2877-2900, (2016), doi:10.5194/acp-16-2877-2016.
- Zhou, M., Yu, H., Dickinson, R. E., Dubovik, O. and Holben, B. N., "A normalized description of the direct effect of key aerosol types on solar radiation as estimated from Aerosol Robotic Network aerosols and Moderate Resolution Imaging Spectroradiometer albedos", *Journal of Geophysical Research-Atmospheres*, **110**, D19, (2005), doi:10.1029/2005jd005909.

1202  
1203  
1204
